1  
2  
3  
4  
5  
6  
7  
8  
9  
10  
11  
12  
13  
14  
15  
16  
17  
18  
19  
20  
21  
22  
23  
24  
25  
26  
27  
28  
29  
30  
31

## siRNA-mediated gene knockdown via electroporation in hydrozoan jellyfish embryos

<sup>1</sup> Tokiha Masuda-Ozawa, <sup>2</sup> Sosuke Fujita, <sup>3</sup> Ryotaro Nakamura, <sup>3</sup> Hiroshi Watanabe, <sup>2</sup> Erina Kuranaga, and <sup>1,4</sup> Yu-ichiro Nakajima\*

1. Frontier Research Institute for Interdisciplinary Sciences, Tohoku University, Sendai, Japan
2. Graduate School of Life Sciences, Tohoku University, Sendai, Japan
3. Evolutionary Neurobiology Unit, Okinawa Institute of Science and Technology Graduate University, Okinawa, Japan
4. Graduate School of Pharmaceutical Sciences, The University of Tokyo

\*Author for correspondence e-mail: [nakaji97@g.ecc.u-tokyo.ac.jp](mailto:nakaji97@g.ecc.u-tokyo.ac.jp)

Tel: +81-3-5841-4863

**Running title:** siRNA gene knockdown in jellyfish embryos

**Main text:** 6487 words (Abstract: 258 words)

**Figures:** 5

**Supplementary information** (Figures: 7; Table: 5)

**Keywords:** siRNA, electroporation, cnidarian, hydrozoan, jellyfish, *Clytia*, *Cladonema*

## 32 **Abstract**

33 As the sister group to bilaterians, cnidarians stand in a unique phylogenetic position that  
34 provides insight into evolutionary aspects of animal development, physiology, and  
35 behavior. While cnidarians are classified into two types, sessile polyps and free-  
36 swimming medusae, most studies at the cellular and molecular levels have been  
37 conducted on representative polyp-type cnidarians and have focused on establishing  
38 techniques of genetic manipulation. Recently, gene knockdown by delivery of short  
39 hairpin RNAs into eggs via electroporation has been introduced in two polyp-type  
40 cnidarians, *Nematostella vectensis* and *Hydractinia symbiolongicarpus*, enabling  
41 systematic loss-of-function experiments. By contrast, **current methods of genetic**  
42 **manipulation for most medusa-type cnidarians, or jellyfish, are quite limited, except for**  
43 ***Clytia hemisphaerica*, and reliable techniques are required to interrogate function of**  
44 **specific genes in different jellyfish species.** Here, we present a method to knock down  
45 target genes by delivering small interfering RNA (siRNA) into fertilized eggs via  
46 electroporation, using the hydrozoan jellyfish, *Clytia hemisphaerica* and *Cladonema*  
47 *paciificum*. We show that siRNAs targeting endogenous *GFP1* and *Wnt3* in *Clytia*  
48 efficiently knock down gene expression and result in known planula phenotypes: loss of  
49 green fluorescence and defects in axial patterning, respectively. We also successfully  
50 knock down endogenous *Wnt3* in *Cladonema* by siRNA electroporation, which  
51 circumvents the technical difficulty of microinjecting small eggs. ***Wnt3* knockdown in**  
52 ***Cladonema* causes gene expression changes in axial markers, suggesting a conserved**  
53 ***Wnt/β-catenin-mediated pathway that controls axial polarity during embryogenesis.*** Our  
54 gene-targeting siRNA electroporation method is applicable to other animals, including  
55 and beyond jellyfish species, and will facilitate the investigation and understanding of  
56 myriad aspects of animal development.

57

58

59

60

61

62

63

## 64 Introduction

65 The phylum Cnidaria is the sister group to Bilateria, having separated from their  
66 common ancestor over 500 million years ago. Cnidarians have diversified their  
67 morphologies across an array forms, including corals, sea anemones, hydroids, and  
68 jellyfish, all of which are divided into two clades: Anthozoa and Medusozoa. The two  
69 differ in that Anthozoa includes only sessile polyp-type animals, while Medusozoa  
70 (Hydrozoa, Staurozoa, Scyphozoa, and Cubozoa) contains two forms: polyp and  
71 medusa, commonly known as jellyfish (Fig. 1A)<sup>1,2</sup>. The life cycle of most, though not all,  
72 jellyfish consists of five forms: gametes, fertilized eggs, planulae, polyps, and  
73 medusae<sup>3</sup>. Fertilized eggs undergo embryogenesis to become planula larvae, which  
74 metamorphose into sessile polyps. While vegetatively-growing polyps give rise to free-  
75 swimming medusae through the process of budding or strobilization, medusae sexually  
76 reproduce by releasing gametes. Due to their unique phylogenetic position, studies  
77 using cnidarians have provided evolutionary insight into development, regeneration, and  
78 behaviors in multicellular animals<sup>1,4,5</sup>. **Despite divergent morphologies and lifestyles**  
79 **among cnidarians, to date, the molecular and cellular understanding of cnidarians has**  
80 **been acquired primarily using polyp-type animals such as the anthozoan *Nematostella***  
81 ***vectensis* and the hydrozoan *Hydra* and *Hydractinia*.** By contrast, jellyfish biology  
82 remains largely unestablished.

83 Among jellyfish species, the hydrozoan *Clytia hemisphaerica* is the best-studied  
84 laboratory model<sup>6,7</sup>. The well-established methodology for maintaining and propagating  
85 animals ensures a reliable source for daily experiments<sup>8</sup>. Transparent and small-sized  
86 medusae make whole-mount visualization achievable, and relatively large-sized eggs  
87 (~180  $\mu\text{m}$  diameter) enable different manipulations via microinjection (Fig. 1B). Indeed,  
88 gene silencing by morpholino oligos and mRNA microinjection as well as gene knockout  
89 via CRISPR/Cas9 allow for the investigation of functions of genes of interest<sup>9-13</sup>.  
90 Furthermore, the *Clytia* genome assembly is complete, and transcriptome profiles are  
91 available for various stages and tissues, even at the single-cell level, which creates the  
92 foundation for research at the molecular level<sup>12,14-18</sup>. These resources and techniques,  
93 together with recently-established transgenesis<sup>19</sup>, have accelerated research into  
94 numerous facets of distinct *Clytia* life stages. **While initial studies focused on**

95 **embryogenesis, current research topics using *Clytia* include gametogenesis,**  
96 **regeneration, and behavior exhibited by adult medusa** <sup>9,10,12,17,19,20</sup>.

97 **Compared to the established model jellyfish *Clytia*,** the hydrozoan *Cladonema*  
98 *pacificum* is an emerging model that has recently been utilized for various studies in  
99 development, regeneration, and physiology<sup>21</sup>. The ease of rearing all stages of  
100 *Cladonema* without a filtration system or large water tank, along with their high  
101 spawning rate, enable easy lab maintenance. Small-sized medusae with branched  
102 tentacles allow for investigations of body size control and tentacle morphogenesis (Fig.  
103 1C)<sup>22-24</sup>. *Cladonema* gametogenesis is regulated by a light-dark cycle as in *Clytia*, and  
104 recent work has identified the neuropeptides involved in oocyte maturation<sup>25</sup>.  
105 Furthermore, *Cladonema* medusae possess **eyes with a complex structure that includes**  
106 **lenses** (ocelli) in their tentacle bulbs, and studies using the closely related species  
107 *Cladonema radiatum* have identified conserved light-sensitive opsins and regulators of  
108 eye formation (*Pax*, *Six*, and *Eya*)<sup>25-29</sup>, providing a model for the evolutionary  
109 developmental biology of photoreceptor organs. Despite these attractive features of  
110 *Cladonema* as a laboratory animal, no genome assembly or transcriptome is currently  
111 available, and genetic manipulation techniques are only just being developed. One  
112 major technical issue in manipulating *Cladonema* is their small eggs—with a diameter of  
113 approximately 60 μm (Fig. 1C), regular microinjection is quite difficult. Establishing  
114 genetic manipulations is required to facilitate the in-depth investigations needed to  
115 further understand the biology of *Cladonema*, and an alternative method that eliminates  
116 the need for microinjection would greatly facilitate that objective.

117 RNA interference (RNAi), the phenomenon of double stranded RNA (dsRNA)  
118 mediated silencing of target genes, has been widely exploited in living organisms to  
119 analyze gene function<sup>30</sup>, primarily using chemically- or *in vitro*-synthesized double-  
120 stranded small interfering RNAs (siRNAs) or vector-based short hairpin RNAs  
121 (shRNAs)<sup>31</sup>. In cnidarians, siRNA-mediated gene silencing was initially applied to  
122 *Nematostella* and *Hydra* polyps via soaking or electroporation<sup>32-34</sup>. More recently, gene  
123 knockdown via shRNA microinjection or electroporation into eggs has been utilized in  
124 studies with *Nematostella* and *Hydractinia* to show efficient reduction in gene  
125 expression and associated phenotypes in early developmental stages<sup>35-38</sup>. In particular,  
126 shRNA delivery via electroporation, which does not require the rigors of microinjection,

127 allows for the experimental gene knockdown of large numbers of individuals  
128 simultaneously<sup>36,38</sup>, opening up the possibility of manipulating genes in different aquatic  
129 animals, even those that produce very small eggs like *Cladonema*.

130 The mechanism of RNAi-mediated gene repression after introducing foreign  
131 dsRNA into cells involves the microRNA (miRNA) pathway, an endogenous gene  
132 repression machinery conserved in both animals and plants<sup>39</sup>. In cnidarians, the  
133 presence of the miRNA pathway has been demonstrated in *Nematostella* and  
134 *Hydra*<sup>32,40,41</sup>. However, little is known about the endogenous RNAi pathway, especially  
135 the presence and roles of miRNAs and the miRNA-related genes, in jellyfish such as  
136 *Clytia* and *Cladonema*. Furthermore, in mammalian cultured cells, siRNAs can induce  
137 gene repression independent of endogenous dsRNA processing factors, while shRNAs  
138 cannot<sup>42,43</sup>. On this basis, we **selected** siRNA instead of shRNA for gene knockdown to  
139 avoid the potential pitfall of dsRNA processing in jellyfish.

140 Here we report a gene knockdown method for jellyfish embryos with siRNA via  
141 electroporation. Using two hydrozoan species, *Clytia hemisphaerica* and *Cladonema*  
142 *pacificum*, we demonstrate that siRNA delivery into fertilized eggs effectively reduces  
143 the expression of endogenous genes. We also confirm the known loss-of-function  
144 phenotypes in *Clytia* after knocking down *GFP1* or *Wnt3*, which are induced in a dose-  
145 dependent manner with siRNA. **We further show that knockdown of *Wnt3* in *Cladonema***  
146 **embryos results in the reduction of gene expression of the oral marker *Brachyury* in**  
147 **planula, implicating the Wnt/ $\beta$ -catenin pathway in the control of oral-aboral patterning.**  
148 Overall, our siRNA-mediated knockdown approach allows for the manipulation of a  
149 large number of embryos through electroporation and enables functional analysis of  
150 early development, providing a new experimental platform applicable to different jellyfish  
151 species and other marine invertebrates.

152

153

## 154 **Materials and Methods**

155

### 156 **Animal culture and spawning induction**

157 *Clytia hemisphaerica* (Z11, Z4B as females and Z4C2, Z23 as males) and *Cladonema*  
158 *pacificum* (6W as females and UN2 as males) were used for this research.

159 *Clytia hemisphaerica* were cultured using a previously reported method<sup>8</sup> with a  
160 few modifications. Artificial sea water (ASW) was prepared using 220 g SEA LIFE  
161 (Marin Tech) per 5L MilliQ water (Merk Millipore) with antibiotics (40 units/ml of penicillin  
162 and 40 µg/ml of streptomycin). Medusae, embryos, and planula larvae were maintained  
163 at 20°C. Medusae were fed daily with Vietnamese brine shrimp (A&A Marine LLC, Elk  
164 Rapids, MI, USA). Spawning timing was controlled by a 13 hours (h) dark /11 h light  
165 cycle, and spawning was induced by light. Male and female medusae were transferred  
166 into V-7 cups (AS ONE) before spawning (60 min for male and 90 min for female after  
167 light stimulation).

168 *Cladonema pacificum* were cultured as previously described<sup>23</sup>. *Cladonema*  
169 medusae were maintained at 22°C in ASW, which was prepared using SEA LIFE (Marin  
170 Tech) dissolved in tap water with chlorine neutralizer (Coroline off, GEX Co. Ltd) (24  
171 p.p.t) and antibiotics (40 units/ml penicillin and 40 µg/ml of streptomycin). Spawning  
172 timing was controlled by a 30 min dark/23.5 h light cycle, and spawning of male and  
173 female gametes was induced by dark stimulation. Before dark stimulation, adult females  
174 and males were separately transferred into V7 cups (AS ONE) and 60 mm dishes (BD),  
175 respectively.

176 *Nematostella vectensis* were cultured as previously described<sup>44</sup>, with a few  
177 modifications. Briefly, adult animals were maintained in brackish water at a salinity one-  
178 third of artificial seawater (35 g/l, pH 7.5-8.0, SEA LIFE, Marin Tech) and fed with  
179 freshly hatched artemia twice per week. Spawning induction was performed at 26°C  
180 under light for at least 11 h.

181

182

### 183 **siRNA and shRNA**

184 siRNA sequences (19 mer RNA + 2 mer DNA) for *CheGFP1*, *CheWnt3*, and *CpWnt3*  
185 were designed based on their CDS sequences by Nippon Gene Co., Ltd, and siRNA  
186 duplexes were synthesized by manufacturers (Nippon Gene Co., Ltd and Sigma-  
187 Aldrich, Merk). Lyophilized siRNA was resuspended in RNase free water to a final  
188 concentration of 6 µg/µl as stock solution. The siRNA stock solution was diluted with  
189 RNase free water to a total volume of 10 µl and then added to 90 µl of fertilized eggs in  
190 15% Ficoll ASW just prior to electroporation.

191 shRNAs were synthesized as described in previous reports<sup>36,38</sup>. Briefly, shRNAs  
192 were synthesized by *in vitro* transcription (IVT) from double stranded DNA templates  
193 using the AmpliScribe™ T7-flash™ transcription kit (Lucigen, Inc.) and were purified  
194 using Direct-Zol™ RNA Miniprep kits (Zymo Research, R2070). Concentrations of  
195 shRNA was measured with a NanoDrop One (Thermo fisher).

196

197

### 198 **Collection of gametes and electroporation for *Clytia* and *Cladonema* fertilized** 199 **eggs**

200 For the preparation of gametes, sexually-mature *Clytia* medusae were treated following  
201 a previously reported method<sup>8</sup>, partially modified to fit our experimental equipment.  
202 Adult medusae were maintained on a 13 h dark/11 h light cycle, and light stimuli  
203 induced gametogenesis in 60 min for sperms and 90 min for eggs (Fig. 2A). For  
204 *Cladonema pacificum*, sexually-mature medusae were maintained on a 30 min  
205 dark/23.5 h light cycle. Dark stimulation induced gametogenesis in 25 min. Unfertilized  
206 eggs were collected and resuspended in 15% Ficoll (Nacalai tesque, Japan) in ASW to  
207 prevent the eggs settling from at the bottom of the microtube or sticking to the microtube  
208 surface, keeping the egg solution homogeneous (Fig. 2B)<sup>36,38</sup>.

209 Unfertilized *Clytia* and *Cladonema* eggs were collected in dishes and transferred  
210 into 1.5 ml tubes coated with Ficoll (Nacalai tesque, Japan) to prevent the eggs from  
211 sticking to the tubes. Sperm water was added into eggs, and the eggs and sperm were  
212 incubated for 5 min at room temperature (20-22°C). The sperm water was then  
213 removed, and fertilized eggs were resuspended in 15% Ficoll in ASW, at which point  
214 siRNA or shRNA was added into fertilized egg solution. The fertilized egg and RNA  
215 mixture was carefully transferred into a 4 mm cuvette and placed into the shockpod  
216 cuvette chamber connected to the Gene Pulser Xcell (Bio-Rad). In most experiments,  
217 the Gene Pulser Xcell was used for pulsing with a square wave voltage of 50 V and a  
218 single pulse duration of 25 ms, except when optimizing electroporation conditions  
219 (Supplementary Figs 1-2). After electroporation, fertilized eggs were transferred to a  
220 dish, and incubated for 10 min. The 15% Ficoll solution was removed and replaced with  
221 new ASW, and the samples were incubated at 20-22°C.

222



223  
224  
225  
226  
227  
228  
229  
230  
231  
232  
233  
234  
235  
236  
237  
238  
239  
240  
241  
242  
243  
244  
245  
246  
247  
248  
249  
250  
251  
252  
253  
254

## **Collection of egg sacs, dejellying, and electroporation of *Nematostella* fertilized eggs**

The collection of egg sacs, dejellying, and electroporation steps were performed as previously described<sup>36</sup> with several modifications. Briefly, unfertilized egg sacs were incubated in culture media with sperm at 20-25°C for 30 min. The fertilized egg sacs were then dejellied in freshly prepared L-Cysteine solution (0.04 g/ml, Nacalai tesque, in brackish water; pH adjusted by 5N NaOH at 7.5-8.0) on a shaker for 10 min. The dejellied eggs were rinsed with brackish water before they were suspended in Ficoll solution (Sigma-Aldrich, in brackish water) at a final concentration of 15%. The suspended eggs and siRNA (5 µg/µl stock solution, in MilliQ) were transferred to a 4 mm cuvette (Bio-Rad) with a final volume of 200 µl and were gently mixed. The Bio-Rad Gene Pulser Xcell was used for pulsing, with a square wave voltage of 50 V and a pulse duration of 25 ms. The samples were transferred to a 100 mm dish and maintained in brackish water for 3 days.

## **Imaging**

GFP and Rhodamine fluorescent imaging as well as bright field imaging, including *in situ* hybridization imaging, were taken with an Axio Zoom V16 (ZEISS), and image processing was done with ZEN 3.4 blue edition (ZEISS) and Fiji/ImageJ software<sup>45</sup>. Intensity of mean values of green fluorescence was measured using the average brightness (pixel value) of the pixels. To prevent planula movement, we added 0.5 M sodium azide (final concentration was less than 0.25M).

## **Morphological quantification of planula larvae**

After *Wnt3* knockdown by siRNA electroporation of *Clytia* or *Cladonema*, we approximated the planula body shape into a two dimensional ellipse, measured both the long and short axes (Figs. 4C and 5D), and calculated the aspect ratio of those values using Fiji/ImageJ software (Figs, 4D, 5E).



255

## 256 **RT-qPCR**

257 For *Clytia* and *Cladonema* samples, total RNA was extracted with RNeasy Mini or Micro  
258 kits (Qiagen). Lysate was treated with DNaseI (Qiagen) for 15 min at room temperature  
259 (RT). cDNA was synthesized with the PrimeScript II 1<sup>st</sup> strand synthesis kit (Takara bio).  
260 RT-qPCR was performed with CFX connect (Bio-Rad) using iTaq™ universal SYBER  
261 Green Supermix (Bio-Rad) or the QuantStudio 6 Flex Real-Time PCR System (Thermo  
262 Fisher) using TB Green Premix Ex TaqII (Tli RNaseH Plus) (Takara, RR820). Gene  
263 expression was normalized to the housekeeping gene, *EF1alpha* or *F-actin capping*  
264 *protein subunit beta*, and the delta-delta-ct method was used for quantification (CFX  
265 maestro software, Bio-Rad or QuantStudio 6 Flex Real-Time PCR System software,  
266 Thermo Fisher).

267 For *Nematostella* samples, total RNA was extracted using the RNeasy Mini Kit  
268 and RNase-Free DNase Set (Qiagen). cDNA synthesis was conducted using the  
269 SuperScript IV First-Strand Synthesis System (Thermo Fisher). RT-qPCR was  
270 performed with the StepOnePlus™ Real-Time PCR System (Applied Biosystems,  
271 Thermo Fisher) using PowerUP SYBR Green Master Mix (Thermo Fisher). Gene  
272 expression was normalized to the housekeeping gene, *NvEf1alpha*, and the delta-delta-  
273 ct method was used for quantification (StepOne™ and StepOnePlus™ Software v2.3).

274

275

## 276 ***In situ* hybridization**

277 Purified total RNA was reverse transcribed into cDNA by PrimeScript™ 2 1st strand  
278 cDNA Synthesis Kit (TaKaRa). The target gene fragments (*Brachyury*, *CpBra*) were  
279 amplified from a cDNA library. The primer sets used for PCR cloning are as follows:  
280 *CpBra*: 5'-GCTCCATAAGATCCGGTGC -3'(forward) and 5'-  
281 TTTGTCGCAGTCGAAGACCA-3'(reverse), or 5'-GAACGGTGATGGACAGGTCA-  
282 3'(forward) and 5'-GGATTCCAAGGATTGGGCGT-3'(reverse). PCR products were sub-  
283 cloned into the TAK101 vector (TOYOBO). The resulting plasmids were used for RNA  
284 probe synthesis with digoxigenin (DIG) labeling mix (Roche) and T7 or T3 RNA  
285 polymerase (Roche), according to the insert direction.

286 Planula larvae were anesthetized in 50% 0.5 M NaN<sub>3</sub> in ASW for 5 min and fixed  
287 overnight at 4°C with 4% paraformaldehyde (PFA) in ASW. Fixed samples were washed  
288 three times with PBS containing 0.1% Tween-20 (PBST), followed by pre-hybridization  
289 in hybridization buffer (HB buffer: 5×SSC, 50% formamide, 0.1% Tween-20, 50 µg/ml  
290 tRNA, 50 µg/ml heparin) at 55°C for 2 h. Samples were hybridized with HB Buffer  
291 containing the probes (final probe concentration: 0.5-1 ng/µL in HB Buffer) at 55°C  
292 overnight and washed. The samples were incubated with 0.05% alkaline phosphatase  
293 (AP)-conjugated anti-DIG antibodies (Roche) in 1% blocking reagent (Roche) in Maleic  
294 acid buffer for 4 h at room temperature. Colorimetric reactions were performed by  
295 NBT/BCIP (Roche) in alkaline phosphatase buffer (100 mM NaCl, 100 mM Tris-HCl (pH  
296 9.5), 50 mM MgCl<sub>2</sub>, 0.1% Tween-20) until the signals were detected.

297

298

### 299 Sequence alignment and phylogenetic analysis

300 Amino acid sequence alignment of Wnt3 and Wnt family proteins were performed by  
301 ClustalW<sup>46</sup>. GenBank accession numbers and protein names are listed in  
302 [Supplementary Table 3 and 4](#). The alignment data was visualized on Jalview software<sup>47</sup>.  
303 Maximum likelihood (ML) tree calculation was inferred on ClustalW with the PhyML  
304 bootstrap method. Branch supports were computed out of 100 bootstrapped trees. The  
305 tree visualization was created using MEGA-X software<sup>48</sup>.

306

307

### 308 qPCR primers

| Name              | Sequence (5'->3')      |                                       |
|-------------------|------------------------|---------------------------------------|
| CpWnt3 qP FW      | CAAATGTGGTCGATCAAACG   | This study                            |
| CpWnt3 qP RV      | TACGCCTTCTGCAACACTTG   | This study                            |
| CpEF1-a_qPCR_F7   | GGTCAATCTCGTTCCTCCA    | This study                            |
| CpEF1-a_qPCR_R7   | TTCCACCAGAGGTATCGGC    | This study                            |
| CpBrachyury F     | AAGGCGTATGTTCCGGTCC    | This study                            |
| CpBrachyury R     | CAACGATGGTCTTCGACTGC   | This study                            |
| CpFoxQ2a F        | AGTTGGAGAAACAGCGTTCG   | This study                            |
| CpFoxQ2a R        | CCGTTGCGCAAAGTCGTCAA   | This study                            |
| CpCapZbeta_qPCR_F | AAAGAAAGCTGGAGACGGTTCA | This study                            |
| CpCapZbeta_qPCR_R | GTAGTGGGCATTTCTTCCGC   | This study                            |
| CheGFP1 qP F      | TTGCTGTCCGAATAGTGCA    | Fourrage<br>et al., 2014<br>Open Biol |

|                 |                        |                                                                          |
|-----------------|------------------------|--------------------------------------------------------------------------|
| CheGFP1 qP RV   | GACAACCTCCTCCTCCGAGTG  | Fourrage et al., 2014<br>Open Biol                                       |
| CheGFP1_2 qP F  | ACAATCGCGTCACACTTAAAGG | This study                                                               |
| CheGFP1_2 qP RV | CGTTGTTTTCTTTGTCCGGC   | This study                                                               |
| CheWnt3 qP F    | ATCATGGCAGGTGGAAACTC   | Leclère et al., 2012<br>Dev Biol                                         |
| CheWnt3 qP RV   | CCCCATTTCCAACCTTCTTC   | Leclère et al., 2012<br>Dev Biol                                         |
| CheEF1a qP F    | TGCTGTTGTCCCAATCTCTG   | Leclère et al., 2012<br>Dev Biol /<br>Fourrage et al., 2014<br>Open Biol |
| CheEF1a qP RV   | AAGACGGAGTGGTTTGGATG   | Leclère et al., 2012<br>Dev Biol /<br>Fourrage et al., 2014<br>Open Biol |
| NvEf1alpha FW   | GGTTGCCTCTTCGCTTACCACT | This study                                                               |
| NvEf1alpha RV   | CGTTCCTGGCTTTAGGACAC   | This study                                                               |
| NvBra1_Fw_1032  | CGGGCTCACACTCTCACTTA   | This study                                                               |
| NvBra1_Rv1174   | CTTGCGGTATGGTGTCCAG    | This study                                                               |

309

### 310 siRNA design

| Name                              | Sequence (5'→3')        |                                                 | ORF        |
|-----------------------------------|-------------------------|-------------------------------------------------|------------|
| siCheGFP1_1 sense                 | CCAUCAGCUUCGAAAAUGAdTdT | This study                                      | HQ397706.1 |
| antisense                         | UCAUUUUCGAAGCUGAUGGdTdT | This study                                      |            |
| siCheGFP1_2 sense                 | UGAUGGCGCUUAUAAAGUudTdT | This study                                      | HQ397706.1 |
| antisense                         | AACUUUAUAAGCGCCAUCAdTdT | This study                                      |            |
| siCheGFP1_3 sense                 | CGGACUCAUUCUCAAAdTdT    | This study                                      | HQ397706.1 |
| antisense                         | UUUUUGAAGAAUGAGUCCGdTdT | This study                                      |            |
| siCheWnt3_1 sense                 | GCAUGUGACUGUAAAUUUAdTdT | This study                                      | EU374721.1 |
| antisense                         | UAAUUUACAGUCACAUGCdTdT  | This study                                      |            |
| siCheWnt3_2 sense                 | ACAGCUUGGUAAAUGUUAdTdT  | This study                                      | EU374721.1 |
| antisense                         | UAACAUUUUACCAAGCUGUdTdT | This study                                      |            |
| siCpWnt3_1 sense                  | GUGGAACUGUAGUGUUUCAdTdT | This study                                      | EU374721.1 |
| antisense                         | UGAAACACUACAGUCCACdTdT  | This study                                      |            |
| siCpWnt3_2 sense                  | AGCGUGUGCUGAAGGUAAAdTdT | This study                                      | EU374721.1 |
| antisense                         | UUUACCUUCAGCACACGCudTdT | This study                                      |            |
| siNvBra1_1 sense                  | GAAGAGAUACGAGUCUAAAdTdT | This study                                      | AF540387.2 |
| antisense                         | UUAGACUCGUGAUCUCUUCdTdT | This study                                      |            |
| siNegative_Control-1 for Nv sense | GCAACACGCAGAGTCGTAAAdT  | Same sequence as Karabulut et al, 2019 Dev Biol |            |
| antisense                         | TTACGACTCTGCGTGTTCdT    | Same sequence as Karabulut et al, 2019 Dev Biol |            |

311

312

313 **shRNA template**

| Name              | Sequence (5'->3')                                                         |            |
|-------------------|---------------------------------------------------------------------------|------------|
| CheWnt3<br>_SI1_F | TAATACGACTCACTATA GCATGTGACTGTAAATTTA<br>TTCAAGAGA TAAATTTACAGTCACATGC TT | This study |
| CheWnt3<br>_SI1_R | AAGCATGTGACTGTAAATTTATCTCTTGAATAAATTTAC<br>AGTCACATGCTATAGTGAGTCGTATTA    | This study |
| CheWnt3<br>_SI2_F | TAATACGACTCACTATA ACAGCTTGGTAAAATGTTA<br>TTCAAGAGA TAACATTTTACCAAGCTGT TT | This study |
| CheWnt3<br>_SI2_R | AAACAGCTTGGTAAAATGTTATCTCTTGAATAACATTTT<br>ACCAAGCTGTTATAGTGAGTCGTATTA    | This study |

314

315

316 **Graphs and statistical analysis**

317 All graphs were prepared in Excel. To assess phenotypes and RT-qPCR statistical  
318 significance, we used the percentage values and delta-delta-Ct values to perform two-  
319 tailed Student's t tests, except in Figure 5F, where a one-tailed Student's t test was  
320 used. For statistics related to fluorescence intensity mean value and aspect ratio,  
321 Kolmogorov–Smirnov normality tests were used. All statistical tests were performed at  
322 <https://www.socscistatistics.com>.

323

324

325 **Results**

326

327 **Optimization of electroporation conditions**

328 In both hydrozoan jellyfish *Clytia hemisphaerica* and *Cladonema pacificum*,  
329 gametogenesis is regulated by light-dark transitions<sup>6,49</sup>. A previous report showed that  
330 *Clytia* medusae release eggs within 110-120 min and sperm within 60-90 min upon light  
331 illumination after 3-8 h of darkness<sup>12</sup>. *Cladonema pacificum*, which live along coastal  
332 areas in Japan, exhibit two types of gametogenesis depending on habitat: the dark-light  
333 transition (light stimulation type) and the light-dark transition (dark stimulation type),  
334 respectively. Dark stimulation *Cladonema* medusae, which we used in this study,  
335 release eggs or sperm within 30 min of dark stimulus after 20-24 h of constant exposure  
336 to light<sup>25,49</sup>. By utilizing the characteristic gametogenesis of these jellyfish species, we  
337 can control egg/sperm release to induce fertilization at any time of day. Indeed, we

338 routinely obtained *Clytia* sperm within 60 min and *Clytia* eggs within 90 min of light on a  
339 13h dark/11h light cycle (Fig. 2A). Similarly, we collected gametes from *Cladonema*  
340 within 25 min of dark stimulation on a 23.5h light/30 min dark cycle (Fig. 2A).

341 To determine optimal electroporation parameters, we first tested different  
342 electroporation conditions and monitored the delivery efficiency of the red fluorescent  
343 dye Rhodamine-Dextran into unfertilized *Clytia* and *Cladonema* eggs (Supplementary  
344 Figs. 1-2). Given that the average molecular weight of siRNA (21-mer, ~13,300 Da) is  
345 similar to the molecular size of Rhodamine-Dextran (10,000 Da), electroporation trials  
346 with Rhodamine-Dextran can visually confirm that small molecules are incorporated into  
347 jellyfish eggs, as previously shown in *Hydractinia* eggs<sup>38</sup>. The collected eggs were  
348 suspended in 15% Ficoll artificial seawater to prevent precipitation and to make a  
349 homogeneous solution (Fig. 2B)<sup>36,38</sup>. We performed electroporation trials for  
350 Rhodamine-Dextran using a cuvette with a 4 mm gap and tested several conditions of  
351 voltage (V) and pulse length time (milliseconds, ms) using a conventional  
352 electroporation system (Fig. 2C). As previous work showed that increasing the number  
353 of pulses does not increase the Dextran delivery rate but decreases the survival rate of  
354 embryos<sup>38</sup>, we fixed the number of pulses to one and incubated unfertilized eggs with 1  
355 mg/ml Dextrane-Rhodamine solution. *Clytia* eggs have little autofluorescence in the red  
356 channel, and without electroporation (No EP), red fluorescence was rarely detected in  
357 unfertilized eggs (Fig. 2D and Supplementary Fig. 1A). We compared the eight different  
358 electroporation conditions and found that the rhodamine fluorescence was detected in  
359 *Clytia* eggs and correlated with the strength of electric voltage, as long as the voltage  
360 was in the range of 50-100 V (Supplementary Figs. 1B-1D). By contrast, when the  
361 voltage exceeded 200 V, the eggs ruptured from physical damage, and cellular debris  
362 was observed (Supplementary Figs, 1E-1G).

363 We performed similar electroporation trials on unfertilized *Cladonema* eggs under  
364 eight different conditions. While red autofluorescence was negligible in the *Cladonema*  
365 eggs in the absence of electroporation (Fig. 2D and Supplementary Fig. 2A),  
366 Rhodamine fluorescence was frequently detected with 50 V (Fig. 2D and  
367 Supplementally Fig. 2E). In the more intense conditions beyond 100 V (Supplementally  
368 Figs. 2F and 2G), the eggs were severely damaged. Based on these results, we  
369 established the optimal electroporation conditions (50 V, 1 pulse, 25 ms) that provide

370 high frequency of Dextran-positive eggs and low levels of cell damage for both jellyfish  
371 eggs (Fig. 2D). Of note, during the initial trials, we used unfertilized eggs, but we found  
372 that the electroporation process severely affected the survival rate of subsequent  
373 embryos. In the case of *Cladonema*, electroporation before fertilization severely  
374 decreased the survival rate of fertilized eggs (7.04% at 1 h post fertilization) while  
375 electroporation after fertilization did not influence the survival rate (No EP: 59.67%, With  
376 EP: 60.15%) (Supplementary Table 1). This dissimilarity is likely due to the decrease of  
377 fertilization rate after electroporation, and both elapsed time after spawning and physical  
378 damage by electroporation can affect fertilization efficiency. Therefore, we decided to  
379 conduct further electroporation experiments with fertilized eggs.

380

381

### 382 **Gene knockdown with siRNA in *Nematostella vectensis***

383 Before attempting gene knockdown via siRNAs electroporation in fertilized jellyfish  
384 eggs, we first used *Nematostella vectensis*, where egg electroporation methodology has  
385 been established<sup>36</sup>. We selected *Nematostella Brachyury* (*NvBra*), a gene expressed in  
386 the blastopore margin that functions in the early embryo<sup>50,51</sup>, as a target. After  
387 electroporation of siRNA targeting *NvBra* in fertilized eggs, we examined *NvBra*  
388 expression in planula larvae at 3 days-post-fertilization (dpf) by RT-qPCR and found  
389 that *NvBra* expression was drastically suppressed compared to no electroporation  
390 controls and negative control siRNAs (Supplementary Fig. 3). We further evaluated  
391 survival rates after electroporation and confirmed that siRNA electroporation does not  
392 severely affect survival rates of 3 dpf planula in any of the tested conditions  
393 (Supplementary Table 2). These results suggest that siRNA delivery into fertilized eggs  
394 via electroporation is an effective gene knockdown method that is comparable to the  
395 effect of shRNA delivery into unfertilized eggs via electroporation<sup>36</sup>, supporting our  
396 attempt to perform gene knockdown via siRNA electroporation using fertilized jellyfish  
397 eggs.

398

399

### 400 **Endogenous *GFP1* knockdown with siRNA in *Clytia hemisphaerica***

401 The hydrozoan jellyfish *Clytia* endogenously expresses green fluorescent proteins,  
402 which are encoded by 14 genes grouped into 4 clusters (*CheGFP1-4*)<sup>16</sup>. The expression  
403 pattern for each GFP changes by stage in the life cycle: for instance, *Clytia* eggs  
404 express maternal *CheGFP2* mRNA, and planula larvae show typical ring-like *CheGFP1*  
405 fluorescence in the lateral ectoderm at 3 dpf<sup>11</sup>. While *CheGFP1* gene expression  
406 becomes dominant in the planula stage; *CheGFP2*, *CheGFP3*, and *CheGFP4* are  
407 expressed in different tissues and organs in the medusa<sup>52</sup>. Momose *et al.* succeeded in  
408 genome editing by injecting CRISPR/Cas9 targeting the endogenous *CheGFP1* into  
409 fertilized eggs, and confirmed the knockout effect by loss of green fluorescence in 3 dpf  
410 planula larvae<sup>11</sup>. In addition, *CheGFP1* is not essential for animal survival, which allows  
411 for the monitoring of knockdown effects after embryogenesis. For these reasons, we  
412 chose endogenous *CheGFP1* for the first target gene of siRNA knockdown.

413 In order to maximize the effect of gene knockdown, we used a combination of  
414 three different siRNAs against *CheGFP1* (Accession No. HQ397706.1; Supplementary  
415 Fig. 4A) in a mixture with a 1:1:1 ratio, and electroporated 600 ng/μl of siRNA mix (200  
416 ng/μl per each siRNA) into fertilized eggs (Fig. 3A). To verify the effect of gene  
417 knockdown, we measured green fluorescence intensity in 2 dpf planula and found that  
418 siRNA (600ng/μl siRNA mix) electroporated embryos showed dramatically reduced  
419 fluorescence intensity compared to the no-siRNA controls (Figs. 3B-D; mean intensity  
420 value:  $5.7 \times 10^3$  for 0 ng/μl control,  $1.8 \times 10^3$  for 600 ng/μl). To evaluate the knockdown  
421 effects at varying doses of siRNA, we next electroporated different concentrations of the  
422 *CheGFP1* siRNA mix (0, 150, 300, and 600 ng/μl) into fertilized eggs. While control 3  
423 dpf planulae with no-electroporation (No EP) as well as those with no-siRNA showed  
424 typical ring-shape GFP fluorescence in the ectoderm, many planulae with *CheGFP1*  
425 siRNA electroporation lost green fluorescence (Figs. 3E-3H). To evaluate the GFP  
426 knockdown effects, we classified planulae with typical GFP1 fluorescence as “wild type”  
427 and planulae with reduced fluorescence as “reduced” for further quantification (Figs. 3I  
428 and 3J). The percentage of wild type phenotype dramatically reduced in an siRNA dose-  
429 dependent manner (Fig. 3K). To further quantify the above result on a molecular level,  
430 we examined relative *CheGFP1* mRNA levels by RT-qPCR using the primer set that  
431 was evaluated in a previously study<sup>52</sup>. Consistent with the image analysis results, we  
432 confirmed a marked reduction of *CheGFP1* gene expression at different concentrations



433 of *CheGFP1* siRNA (Fig. 3L). These results demonstrate that siRNAs targeting  
434 *CheGFP1* repress its expression upon electroporation and that the knockdown effects  
435 are dose-dependent.

436       Given the presence of multiple *CheGFP1* loci (seven nearly identical *CheGFP1*  
437 genes) in the *Clytia* genome<sup>16</sup>, it was not clear whether three siRNAs against *GFP1*  
438 sufficiently suppress gene expression in different versions of *CheGFP1*, particularly  
439 those expressed in the planula stage (Supplementary Fig. 4A). We thus performed RT-  
440 qPCR using the newly designed primer set that amplifies all seven *CheGFP1* genes and  
441 found a dramatic reduction of gene expression upon electroporation of *CheGFP1*  
442 siRNAs (600 ng/μl) (Supplementary Fig. 4B). Altogether, these results indicate that our  
443 combination of *CheGFP1* siRNAs suppresses gene expression of *CheGFP1* in the  
444 *Clytia* planula.

445  
446

#### 447 ***Wnt3* knockdown with siRNA in *Clytia hemisphaerica***

448 Since electroporation of siRNAs targeting endogenous *CheGFP1* was shown to be  
449 effective, we next decided to investigate the effects of knocking down other genes that  
450 play important roles in early development. *Wnt3* is a secreted signaling protein in the  
451 Wnt/β-catenin pathway that is involved in diverse developmental processes including  
452 cell fate decisions and patterning<sup>53,54</sup>. In *Clytia*, *Wnt3* RNA is maternally localized to the  
453 animal cortex, the future oral side of the **embryo**, and *Wnt3* organizes axial patterning  
454 as the main ligand for the Wnt/β-catenin pathway in the early embryonic stage<sup>10</sup>. After  
455 embryogenesis, the *Clytia* planula normally elongates along the oral-aboral axis and  
456 becomes oval in shape (Fig. 4A). By contrast, after *CheWnt3* morpholino injection, the  
457 morphant loses oral-aboral axis polarity and exhibits a spherical shape<sup>10</sup>. This raises the  
458 possibility that knockdown of *CheWnt3* via siRNA may result in a similar spherical  
459 morphology for *Clytia* larvae as is observed in *CheWnt3* morphants. Therefore, to  
460 evaluate siRNA knockdown effects on *Clytia*, we chose *CheWnt3* as our second target.

461       We used a mixture of two different siRNAs (1:1 ratio) targeting *CheWnt3*, and  
462 carried out electroporation of the siRNA mix into *Clytia* fertilized eggs. After  
463 electroporation of *CheWnt3* siRNAs, 1 dpf planula larvae showed nearly complete  
464 spherical morphology (Fig. 4B), which is reminiscent of *CheWnt3* morphants<sup>10</sup>. To

465 quantify the effect of siRNA knockdown on *Clytia* larval morphology, we calculated the  
466 aspect ratio in two dimensions, where values greater than 1.0 shows the tendency to be  
467 oval (ellipsoid-like) while a value of 1.0 indicates a perfect circle (sphere) (Fig. 4C). The  
468 control larvae with 0 ng/μl siRNA showed a median aspect ratio of 1.69, indicating a  
469 typical ellipsoid-like morphology. By contrast, larvae that underwent electroporation with  
470 *CheWnt3* siRNAs (400 ng/μl) showed a median aspect ratio of 1.16, suggesting a much  
471 greater tendency toward spherical morphology (Fig. 4D). These results quantitatively  
472 confirmed the effect of *CheWnt3* knockdown on larval morphology, which phenocopies  
473 *CheWnt3* morphants<sup>10</sup>. To analyze the level of gene-specific knockdown at varying  
474 doses of siRNAs, we next electroporated mixtures of 0, 100, 200, and 400 ng/μl of  
475 *CheWnt3* siRNAs into *Clytia* fertilized eggs (Figs. 4E-4H). To evaluate *CheWnt3* siRNA  
476 effects on morphology, we classified 1 dpf planulae with elongated ellipsoid-like shapes  
477 as “normal” and planulae with spherical shapes as “spherical” (Figs. 4I and 4J). The  
478 percentage of normal phenotype dramatically reduced after *CheWnt3* siRNA-  
479 electroporation (< 1.0 % in 400 ng/μl), even at the lowest dose (5.2% in 100 ng/μl) (Fig.  
480 4K). To further evaluate the result at a molecular level, we analyzed relative *CheWnt3*  
481 mRNA levels by RT-qPCR and confirmed a significant reduction in *CheWnt3* gene  
482 expression at all concentrations (Fig. 4L). Of note, after electroporation with universal  
483 negative control siRNA (Nippon Gene Co., Ltd.), both morphological phenotypes and  
484 relative gene expression were comparable to no-siRNA controls (Figs. 4K and 4L),  
485 further confirming that siRNA-mediated knockdown by electroporation is target-specific.  
486 These results together indicate that siRNAs targeting endogenous genes effectively  
487 knock down their expression in *Clytia* embryos.

488       Effective gene knockdown via shRNA electroporation has previously been  
489 reported using two cnidarian polyps, *Nematostella vectensis* and *Hydractinia*  
490 *symbiolongicarpus*<sup>36,38</sup>. To test whether shRNAs are also effective in the hydrozoan  
491 jellyfish *Clytia*, we designed shRNAs targeting *CheWnt3* using the same 19 bp target  
492 sequence that was used for siRNAs, and performed electroporation on fertilized eggs  
493 with a mix of two different *Wnt3* shRNAs. After electroporation of *Wnt3* shRNAs, relative  
494 *Wnt3* mRNA expression in 1 dpf planula was weakly down-regulated (0.83), and was  
495 not significant compared to the striking effects of *Wnt3* siRNA electroporation (0.039) at  
496 the same concentration (400 ng/μl) (Fig. 4L). In addition, electroporation of *Wnt3*

497 siRNAs resulted in an extensive morphological change toward spherical shaped  
498 planulae, showing almost no "normal" phenotype (0.71%), whereas electroporation of  
499 shRNA had a limited effect (60.4%) (Fig. 4K). These results suggest that the effect of  
500 siRNA is much stronger than that of shRNA in *Clytia* when treated with the same target  
501 sequence and concentration.

502

### 503 **Identification of *Wnt3* in *Cladonema pacificum***

504 In contrast to *Clytia*, the sole genetic model jellyfish, previous studies have neither  
505 established genetic manipulation nor performed genome sequencing of *Cladonema*  
506 *pacificum*, despite its unique biological features. This is partly because the extremely  
507 small size of the *Cladonema* egg makes microinjection difficult. By testing whether  
508 siRNA-mediated knockdown via electroporation can work in *Cladonema*, we can start to  
509 manipulate genes in *Cladonema* while also demonstrating that siRNA electroporation  
510 can be applicable to other jellyfish species. While green fluorescent protein (GFP) is  
511 often an easy early target for gene manipulation in emerging organisms, *Cladonema*  
512 does not exhibit apparent endogenous green fluorescence expression at any stage,  
513 unlike *Clytia*. We instead turned our focus to *Wnt3* as the target for gene knockdown in  
514 *Cladonema* since *Wnt3* plays an important role in early embryonic development in  
515 several cnidarian species<sup>55,56</sup>.

516 To identify the *Wnt3* ortholog in *Cladonema*, we utilized RNA-seq results from the  
517 *Cladonema* polyp, stolon, and medusa manubrium (data not shown). We performed  
518 *Cladonema Wnt3* CDS annotation using the *Clytia* CDS database (MARIMBA, Marine  
519 models database: <http://marimba.obs-vlfr.fr>) and found one contig annotated with *Wnt3*  
520 (*CpWnt3*) and multiple *Wnt* genes (Supplementary Figs. 5 and 6). We then performed  
521 phylogenetic analysis using the neighbor-joining method, and confirmed *CpWnt3*  
522 (LC720435) is grouped with medusozoan *Hydra vulgaris* (*HvWnt3*) and *Clytia Wnt3*  
523 (*CheWnt3*) rather than Anthozoa *Nematostella* and *Acropora digitifera* (Supplementary  
524 Fig. 5A). Multiple sequence alignment further showed highly conserved amino acids  
525 sequences among different species including bilaterians and cnidarians (Supplementary  
526 Fig. 5B). These findings raise the possibility that *CpWnt3* has a similar function in  
527 controlling the Wnt/ $\beta$ -catenin pathway in *Cladonema*.

528

529

### 530 ***Wnt3* knockdown with siRNA in *Cladonema pacificum***

531 Does *Wnt3* function during *Cladonema* embryogenesis, particularly during axial  
532 patterning? Interestingly, *Cladonema* planula larvae do not show a clear elongated  
533 shape (Fig. 5A), as observed in *Clytia*. It is thus possible that morphogenesis, including  
534 axial patterning and/or Wnt/ $\beta$ -catenin pathway function, differs between these two  
535 jellyfish species. **It is also possible that the limited elongation in *Cladonema* planulae  
536 might hamper phenotypical appearance upon inhibition of Wnt/ $\beta$ -catenin signaling.**

537 In order to verify that siRNA electroporation works in *Cladonema* and that *Wnt3*  
538 affects axial patterning, we performed electroporation of siRNAs targeting *CpWnt3*. We  
539 prepared fertilized *Cladonema* eggs as we did in *Clytia*, and used a mixture of two  
540 different siRNAs against *CpWnt3* CDS with a 1:1 ratio (300 ng/ $\mu$ l) and performed  
541 electroporation with the previously established parameters (50V, 1 pulse, 25 ms) in  
542 fertilized *Cladonema* eggs. **After electroporation of siRNAs for *CpWnt3*, planula larvae  
543 did not exhibit morphological differences compared to controls (Figs. 5A-5C; median  
544 aspect ratio: 1.21 for 0 ng/ $\mu$ l control, 1.16 for 300 ng/ $\mu$ l for si*CpWnt3*). We then  
545 quantified the morphological phenotypes by calculating the aspect ratio of 1 dpf  
546 planulae and confirmed that *CpWnt3* knockdown does not cause a significant  
547 morphological change (Figs. 5D and 5E), **which is consistent with the possibility that  
548 *Cladonema* planulae simply exhibit limited elongation.****

549 **Another** possibility that would explain the above result is a defect in the siRNA  
550 knockdown itself. To test this potential explanation, we carried out RT-qPCR using  
551 mRNA samples from 1 dpf planula after electroporating different concentrations of  
552 *CpWnt3* siRNA mix (0, 150, and 300 ng/ $\mu$ l) into fertilized eggs. We confirmed a  
553 reduction of *Wnt3* gene expression in an siRNA dose-dependent manner (Fig. 5F),  
554 eliminating siRNA knockdown defects as the cause of our initial result.

555 **To further confirm whether the Wnt/ $\beta$ -catenin pathway is affected by *Wnt3*  
556 knockdown, we examined the gene expression of axial markers *Brachyury* (*CpBra*) and  
557 *FoxQ2a* (*CpFoxQ2a*), whose expression are influenced by the Wnt/ $\beta$ -catenin pathway in  
558 *Clytia*<sup>10</sup>. From RT-qPCR, we found that *CpWnt3* knockdown causes a decrease in  
559 *CpBra* gene expression and an increase in *CpFoxQ2a* gene expression (Supplementary  
560 Fig. 7). We also examined *CpBra* expression by *in situ* hybridization and confirmed the**

561 reduction of *CpBra* expression on the oral side of planula larvae (Figs. 5G-5I), which is  
562 similar to the phenotype exhibited by *CheWnt3* morphants in *Clytia*<sup>10</sup>. Notably, after  
563 *CpWnt3* siRNAs electroporation, the rate of metamorphosis from planula to primary  
564 polyp decreased dramatically (Supplementary Table 5), implying potential  
565 developmental defects upon abrogation of the Wnt/ $\beta$ -catenin pathway. These results  
566 suggest that, although overall oral-aboral polarity is less prominent in *Cladonema*  
567 compared to *Clytia* at the morphological level, the axial patterning mechanism mediated  
568 by Wnt/ $\beta$ -catenin signaling may be conserved between these two jellyfish species.

569

570

## 571 Discussion

572 In this study, we have established a method to knock down endogenous genes in two  
573 hydrozoan jellyfish, *Clytia hemisphaerica* and *Cladonema pacificum*, via the siRNA  
574 electroporation of fertilized eggs. We showed that knockdown of endogenous *GFP1* in  
575 *Clytia* causes the loss of GFP fluorescence in the planula stage (Fig. 3), as previously  
576 achieved by CRISPR/Cas9-mediated *GFP1* knockout<sup>11</sup>. We also confirmed that  
577 knockdown of *Wnt3* in *Clytia* induces spherical morphology of the planula (Fig. 4),  
578 mirroring the results of injections of *Wnt3* morpholino antisense oligo<sup>10</sup>. We further  
579 succeeded in efficient repression of *Wnt3* gene expression in *Cladonema* after *Wnt3*  
580 siRNA electroporation and found that expression of axial patterning genes is controlled  
581 by the Wnt/ $\beta$ -catenin pathway (Fig. 5), suggesting that the conserved mechanism is  
582 involved in embryogenesis and planula morphogenesis across hydrozoan jellyfish  
583 species.

584 Our results show that the knockdown efficiency of siRNA is much greater than  
585 that of shRNA for electroporation of *Clytia* fertilized eggs with the same *Wnt3* target  
586 sequence in the same concentration (Fig. 4K-4L). One possibility that would explain  
587 such distinct effects between siRNA and shRNA electroporation is the existence of  
588 differences in the RNAi machinery or RNA processing efficiency among cnidarians.  
589 During RNAi in mammals, the RNase III Dicer protein processes shRNA in collaboration  
590 with cofactors TRBP (Transactivation response element RNA-binding protein) and  
591 PACT (protein activator of the interferon-induced protein kinase) to produce a mature  
592 form of siRNA<sup>39</sup>. Mature siRNA in the Dicer and TRBP/PACT complex is associated

593 with the Argonaute protein and cleaves endogenous complementary mRNAs as the  
594 RNA-induced silencing complex<sup>30,57</sup>. These small RNA biogenesis factors, Dicers and  
595 cofactors (TRBP in bilaterians, HYL1 in plants and cnidarians), are found in  
596 *Nematostella vectensis*, *Acropora digitifera*, and *Hydra vulgaris*<sup>41</sup>. Although Dicers  
597 (TCONS\_00004571 and TCONS\_00004525) and Hyl1 (TCONS\_00010722) are  
598 predicted to exist in *Clytia* based on MARIMBA transcriptome data, the expression level  
599 of Dicers in oocytes and early gastrulation stages is lower than that in other stages,  
600 suggesting the possibility that insufficient shRNA to siRNA processing efficiency is  
601 responsible for the difference in knockdown efficiency between siRNA and shRNA  
602 electroporation. It will be interesting to elucidate the detailed molecular mechanism of  
603 RNAi in different cnidarian species and address RNA processing efficiency in distinct  
604 developmental stages. **The lower efficiency of knockdown by shRNA compared to  
605 siRNA in *Clytia* could also be simply explained by lower shRNA electroporation  
606 efficiency. This possibility could be tested by inserting shRNA or siRNA into fertilized  
607 eggs by microinjection, instead of electroporation, which would be followed by  
608 assessing gene expression and phenotypes.**

609 During *Clytia* early embryogenesis, *Wnt3* RNA is localized to the animal cortex of  
610 the egg and contributes to the formation of the oral-aboral axis<sup>10</sup>. Accordingly,  
611 knockdown of *Wnt3* in *Clytia* fertilized eggs induces suppression of axis formation and  
612 planula elongation (Fig. 4). **In contrast, despite the fact that no morphological phenotype  
613 was observed after *Wnt3* knockdown in *Cladonema*, gene expression of the conserved  
614 axial patterning genes, *Brachyury* and *FoxQ2a*, was disrupted (Figs. 5G-5H and  
615 Supplementary Fig. 7). In addition to *Clytia*, the Wnt/ $\beta$ -catenin pathway is involved in  
616 axis formation during cnidarian embryogenesis including *Nematostella*<sup>44,55,58</sup>,  
617 *Acropora*<sup>59</sup>, and *Hydractinia*<sup>56</sup>. Furthermore, given that the Wnt/ $\beta$ -catenin pathway is  
618 also associated with axis formation during metamorphosis in *Hydractinia*<sup>56,60</sup> and  
619 *Clytia*<sup>61</sup>, the reduced metamorphosis rate observed in *CpWnt3* knockdown *Cladonema*  
620 may be attributed to disrupted axis formation (Supplementary Table 5). Taken together,  
621 our data support the pivotal role of Wnt/ $\beta$ -catenin signaling in cnidarian development.**

622 **Why do *Cladonema* planulae show a less elongated morphology during the  
623 transition from embryos? In the torpedo-shaped *Clytia* planula, the Wnt/Planar Cell  
624 Polarity (PCP) pathway is activated during the gastrulation phase, which causes**



625 elongation of the body axis<sup>62</sup>. In contrast, the PCP pathway is independent of the Wnt/ $\beta$ -  
626 catenin pathway in *Nematostella*, which have relatively short planula morphology<sup>63</sup>. It is  
627 thus possible that the Wnt/PCP pathway is not associated with cell polarity and  
628 elongation in *Cladonema*, but more detailed studies are needed.

629 An interesting feature of jellyfish is that their morphology dramatically changes  
630 across their life cycle from planula to polyp and then to medusa. In particular, polyps  
631 and medusae, different adult stages of the same animal, exhibit distinct regenerative  
632 ability, lifespan, and behaviors. Although regeneration mechanisms have been  
633 extensively studied in polyp-only animals such as *Hydra* and *Hydractinia*, classical  
634 studies have used the medusa stage of several jellyfish species and demonstrated their  
635 regenerative potential<sup>21</sup>. Recent work using *Clytia* medusae has further shown a  
636 remarkable remodeling and repatterning mechanism orchestrated by muscle systems  
637 upon organ loss<sup>17</sup>. At the behavior level, the medusae of the upside-down  
638 jellyfish *Cassiopea* exhibit a sleep-like state<sup>64</sup>, which is similarly observed in *Hydra*  
639 polyps<sup>65</sup>. More recent work using transgenic *Clytia* has characterized feeding behaviors  
640 in medusae at a neural-network resolution<sup>19</sup>. To understand how these diverse  
641 biological processes in jellyfish are regulated at the molecular level, the functions of  
642 specific genes at various stages must be analyzed. Although gene knockdown by  
643 dsRNA electroporation into polyps in the scyphozoan jellyfish *Aurelia* has been  
644 reported<sup>66</sup>, genetic manipulation in medusae has not yet been achieved. Given that  
645 siRNA electroporation is applicable to *Hydra* polyps<sup>33,67</sup> in addition to cnidarian fertilized  
646 eggs, we now have a better chance to apply this technique to the medusa stage,  
647 although, because they are susceptible to electric shock, electroporation parameters  
648 must be optimized in order to achieve gene knockdown in medusae. Collectively, our  
649 gene knockdown via siRNA electroporation method will complement the existing shRNA  
650 electroporation approach in cnidarian polyps and will enable molecular-level analysis of  
651 the vast biological phenomena exhibited across the different life stages in jellyfish.

652  
653

## 654 References

655 1 Technau, U. & Steele, R. E. Evolutionary crossroads in developmental biology:  
656 Cnidaria. *Development* **138**, 1447-1458, doi:10.1242/dev.048959 (2011).



- 657 2 Zapata, F. *et al.* Phylogenomic Analyses Support Traditional Relationships within  
658 Cnidaria. *PLoS One* **10**, e0139068, doi:10.1371/journal.pone.0139068 (2015).
- 659 3 Leclere, L. & Rottinger, E. Diversity of Cnidarian Muscles: Function, Anatomy,  
660 Development and Regeneration. *Front Cell Dev Biol* **4**, 157,  
661 doi:10.3389/fcell.2016.00157 (2016).
- 662 4 Holstein, T. W., Hobmayer, E. & Technau, U. Cnidarians: an evolutionarily  
663 conserved model system for regeneration? *Dev Dyn* **226**, 257-267,  
664 doi:10.1002/dvdy.10227 (2003).
- 665 5 Bosch, T. C. G. *et al.* Back to the Basics: Cnidarians Start to Fire. *Trends*  
666 *Neurosci* **40**, 92-105, doi:10.1016/j.tins.2016.11.005 (2017).
- 667 6 Houliston, E., Momose, T. & Manuel, M. Clytia hemisphaerica: a jellyfish cousin  
668 joins the laboratory. *Trends Genet* **26**, 159-167, doi:10.1016/j.tig.2010.01.008  
669 (2010).
- 670 7 Houliston, E., Leclere, L., Munro, C., Copley, R. R. & Momose, T. Past, present  
671 and future of Clytia hemisphaerica as a laboratory jellyfish. *Curr Top Dev Biol*,  
672 doi:10.1016/bs.ctdb.2021.12.014 (2022).
- 673 8 Lechable, M. *et al.* An improved whole life cycle culture protocol for the  
674 hydrozoan genetic model Clytia hemisphaerica. *Biol Open* **9**,  
675 doi:10.1242/bio.051268 (2020).
- 676 9 Momose, T. & Houliston, E. Two oppositely localised frizzled RNAs as axis  
677 determinants in a cnidarian embryo. *PLoS Biol* **5**, e70,  
678 doi:10.1371/journal.pbio.0050070 (2007).
- 679 10 Momose, T., Derelle, R. & Houliston, E. A maternally localised Wnt ligand  
680 required for axial patterning in the cnidarian Clytia hemisphaerica. *Development*  
681 **135**, 2105-2113, doi:10.1242/dev.021543 (2008).
- 682 11 Momose, T. *et al.* High doses of CRISPR/Cas9 ribonucleoprotein efficiently  
683 induce gene knockout with low mosaicism in the hydrozoan Clytia hemisphaerica  
684 through microhomology-mediated deletion. *Sci Rep* **8**, 11734,  
685 doi:10.1038/s41598-018-30188-0 (2018).
- 686 12 Quiroga Artigas, G. *et al.* A gonad-expressed opsin mediates light-induced  
687 spawning in the jellyfish Clytia. *Elife* **7**, doi:10.7554/eLife.29555 (2018).

- 688 13 Quiroga Artigas, G. *et al.* A G protein-coupled receptor mediates neuropeptide-  
689 induced oocyte maturation in the jellyfish *Clytia*. *PLoS Biol* **18**, e3000614,  
690 doi:10.1371/journal.pbio.3000614 (2020).
- 691 14 Lapebie, P. *et al.* Differential responses to Wnt and PCP disruption predict  
692 expression and developmental function of conserved and novel genes in a  
693 cnidarian. *PLoS Genet* **10**, e1004590, doi:10.1371/journal.pgen.1004590 (2014).
- 694 15 Condamine, T. *et al.* Molecular characterisation of a cellular conveyor belt in  
695 *Clytia* medusae. *Dev Biol* **456**, 212-225, doi:10.1016/j.ydbio.2019.09.001 (2019).
- 696 16 Leclere, L. *et al.* The genome of the jellyfish *Clytia hemisphaerica* and the  
697 evolution of the cnidarian life-cycle. *Nat Ecol Evol* **3**, 801-810,  
698 doi:10.1038/s41559-019-0833-2 (2019).
- 699 17 Sinigaglia, C. *et al.* Pattern regulation in a regenerating jellyfish. *Elife* **9**,  
700 doi:10.7554/eLife.54868 (2020).
- 701 18 Chari, T. *et al.* Whole-animal multiplexed single-cell RNA-seq reveals  
702 transcriptional shifts across *Clytia* medusa cell types. *Sci Adv* **7**, eabh1683,  
703 doi:10.1126/sciadv.abh1683 (2021).
- 704 19 Weissbourd, B. *et al.* A genetically tractable jellyfish model for systems and  
705 evolutionary neuroscience. *Cell* **184**, 5854-5868 e5820,  
706 doi:10.1016/j.cell.2021.10.021 (2021).
- 707 20 Leclere, L. *et al.* Maternally localized germ plasm mRNAs and germ cell/stem cell  
708 formation in the cnidarian *Clytia*. *Dev Biol* **364**, 236-248,  
709 doi:10.1016/j.ydbio.2012.01.018 (2012).
- 710 21 Fujita, S., Kuranaga, E. & Nakajima, Y. I. Regeneration Potential of Jellyfish:  
711 Cellular Mechanisms and Molecular Insights. *Genes (Basel)* **12**,  
712 doi:10.3390/genes12050758 (2021).
- 713 22 Fujiki, A., Hou, S., Nakamoto, A. & Kumano, G. Branching pattern and  
714 morphogenesis of medusa tentacles in the jellyfish *Cladonema pacificum*  
715 (Hydrozoa, Cnidaria). *Zoological Lett* **5**, 12, doi:10.1186/s40851-019-0124-4  
716 (2019).
- 717 23 Fujita, S., Kuranaga, E. & Nakajima, Y. I. Cell proliferation controls body size  
718 growth, tentacle morphogenesis, and regeneration in hydrozoan jellyfish  
719 *Cladonema pacificum*. *PeerJ* **7**, e7579, doi:10.7717/peerj.7579 (2019).

- 720 24 Hou, S., Zhu, J., Shibata, S., Nakamoto, A. & Kumano, G. Repetitive  
721 accumulation of interstitial cells generates the branched structure of *Cladonema*  
722 medusa tentacles. *Development* **148**, doi:10.1242/dev.199544 (2021).
- 723 25 Takeda, N. *et al.* Identification of jellyfish neuropeptides that act directly as  
724 oocyte maturation-inducing hormones. *Development* **145**,  
725 doi:10.1242/dev.156786 (2018).
- 726 26 Stierwald, M., Yanze, N., Bamert, R. P., Kammermeier, L. & Schmid, V. The *Sine*  
727 *oculis*/*Six* class family of homeobox genes in jellyfish with and without eyes:  
728 development and eye regeneration. *Dev Biol* **274**, 70-81,  
729 doi:10.1016/j.ydbio.2004.06.018 (2004).
- 730 27 Suga, H., Schmid, V. & Gehring, W. J. Evolution and functional diversity of  
731 jellyfish opsins. *Curr Biol* **18**, 51-55, doi:10.1016/j.cub.2007.11.059 (2008).
- 732 28 Suga, H. *et al.* Flexibly deployed Pax genes in eye development at the early  
733 evolution of animals demonstrated by studies on a hydrozoan jellyfish. *Proc Natl*  
734 *Acad Sci U S A* **107**, 14263-14268, doi:10.1073/pnas.1008389107 (2010).
- 735 29 Graziussi, D. F., Suga, H., Schmid, V. & Gehring, W. J. The "eyes absent" (*eya*)  
736 gene in the eye-bearing hydrozoan jellyfish *Cladonema radiatum*: conservation of  
737 the retinal determination network. *J Exp Zool B Mol Dev Evol* **318**, 257-267,  
738 doi:10.1002/jez.b.22442 (2012).
- 739 30 Meister, G. & Tuschl, T. Mechanisms of gene silencing by double-stranded RNA.  
740 *Nature* **431**, 343-349, doi:10.1038/nature02873 (2004).
- 741 31 Rao, D. D., Vorhies, J. S., Senzer, N. & Nemunaitis, J. siRNA vs. shRNA:  
742 similarities and differences. *Adv Drug Deliv Rev* **61**, 746-759,  
743 doi:10.1016/j.addr.2009.04.004 (2009).
- 744 32 Moran, Y. *et al.* Cnidarian microRNAs frequently regulate targets by cleavage.  
745 *Genome Res* **24**, 651-663, doi:10.1101/gr.162503.113 (2014).
- 746 33 Watanabe, H. *et al.* Nodal signalling determines biradial asymmetry in *Hydra*.  
747 *Nature* **515**, 112-115, doi:10.1038/nature13666 (2014).
- 748 34 Pankow, S. & Bamberger, C. The p53 tumor suppressor-like protein *nvp63*  
749 mediates selective germ cell death in the sea anemone *Nematostella vectensis*.  
750 *PLoS One* **2**, e782, doi:10.1371/journal.pone.0000782 (2007).

- 751 35 He, S. *et al.* An axial Hox code controls tissue segmentation and body patterning  
752 in *Nematostella vectensis*. *Science* **361**, 1377-1380,  
753 doi:10.1126/science.aar8384 (2018).
- 754 36 Karabulut, A., He, S., Chen, C. Y., McKinney, S. A. & Gibson, M. C.  
755 Electroporation of short hairpin RNAs for rapid and efficient gene knockdown in  
756 the starlet sea anemone, *Nematostella vectensis*. *Dev Biol* **448**, 7-15,  
757 doi:10.1016/j.ydbio.2019.01.005 (2019).
- 758 37 DuBuc, T. Q. *et al.* Transcription factor AP2 controls cnidarian germ cell  
759 induction. *Science* **367**, 757-762, doi:10.1126/science.aay6782 (2020).
- 760 38 Quiroga-Artigas, G., Duscher, A., Lundquist, K., Waletich, J. & Schnitzler, C. E.  
761 Gene knockdown via electroporation of short hairpin RNAs in embryos of the  
762 marine hydroid *Hydractinia symbiolongicarpus*. *Sci Rep* **10**, 12806,  
763 doi:10.1038/s41598-020-69489-8 (2020).
- 764 39 Ha, M. & Kim, V. N. Regulation of microRNA biogenesis. *Nat Rev Mol Cell Biol*  
765 **15**, 509-524, doi:10.1038/nrm3838 (2014).
- 766 40 Krishna, S. *et al.* Deep sequencing reveals unique small RNA repertoire that is  
767 regulated during head regeneration in *Hydra magnipapillata*. *Nucleic Acids Res*  
768 **41**, 599-616, doi:10.1093/nar/gks1020 (2013).
- 769 41 Moran, Y., Praher, D., Fredman, D. & Technau, U. The evolution of microRNA  
770 pathway protein components in Cnidaria. *Mol Biol Evol* **30**, 2541-2552,  
771 doi:10.1093/molbev/mst159 (2013).
- 772 42 Murchison, E. P., Partridge, J. F., Tam, O. H., Cheloufi, S. & Hannon, G. J.  
773 Characterization of Dicer-deficient murine embryonic stem cells. *Proc Natl Acad*  
774 *Sci U S A* **102**, 12135-12140, doi:10.1073/pnas.0505479102 (2005).
- 775 43 Kok, K. H., Ng, M. H., Ching, Y. P. & Jin, D. Y. Human TRBP and PACT directly  
776 interact with each other and associate with dicer to facilitate the production of  
777 small interfering RNA. *J Biol Chem* **282**, 17649-17657,  
778 doi:10.1074/jbc.M611768200 (2007).
- 779 44 Watanabe, H. *et al.* Sequential actions of beta-catenin and Bmp pattern the oral  
780 nerve net in *Nematostella vectensis*. *Nat Commun* **5**, 5536,  
781 doi:10.1038/ncomms6536 (2014).

- 782 45 Schindelin, J. *et al.* Fiji: an open-source platform for biological-image analysis.  
783 *Nat Methods* **9**, 676-682, doi:10.1038/nmeth.2019 (2012).
- 784 46 Thompson, J. D., Higgins, D. G. & Gibson, T. J. CLUSTAL W: improving the  
785 sensitivity of progressive multiple sequence alignment through sequence  
786 weighting, position-specific gap penalties and weight matrix choice. *Nucleic Acids*  
787 *Res* **22**, 4673-4680, doi:10.1093/nar/22.22.4673 (1994).
- 788 47 Waterhouse, A. M., Procter, J. B., Martin, D. M., Clamp, M. & Barton, G. J.  
789 Jalview Version 2--a multiple sequence alignment editor and analysis workbench.  
790 *Bioinformatics* **25**, 1189-1191, doi:10.1093/bioinformatics/btp033 (2009).
- 791 48 Kumar, S., Stecher, G., Li, M., Knyaz, C. & Tamura, K. MEGA X: Molecular  
792 Evolutionary Genetics Analysis across Computing Platforms. *Mol Biol Evol* **35**,  
793 1547-1549, doi:10.1093/molbev/msy096 (2018).
- 794 49 Deguchi, R., Kondoh, E. & Itoh, J. Spatiotemporal characteristics and  
795 mechanisms of intracellular Ca(2+) increases at fertilization in eggs of jellyfish  
796 (Phylum Cnidaria, Class Hydrozoa). *Dev Biol* **279**, 291-307,  
797 doi:10.1016/j.ydbio.2004.11.036 (2005).
- 798 50 Scholz, C. B. & Technau, U. The ancestral role of Brachyury: expression of  
799 *NemBra1* in the basal cnidarian *Nematostella vectensis* (Anthozoa). *Dev Genes*  
800 *Evol* **212**, 563-570, doi:10.1007/s00427-002-0272-x (2003).
- 801 51 Servetnick, M. D. *et al.* Cas9-mediated excision of *Nematostella brachyury*  
802 disrupts endoderm development, pharynx formation and oral-aboral patterning.  
803 *Development* **144**, 2951-2960, doi:10.1242/dev.145839 (2017).
- 804 52 Fourrage, C., Swann, K., Gonzalez Garcia, J. R., Campbell, A. K. & Houliston, E.  
805 An endogenous green fluorescent protein-photoprotein pair in *Clytia*  
806 *hemisphaerica* eggs shows co-targeting to mitochondria and efficient  
807 bioluminescence energy transfer. *Open Biol* **4**, 130206, doi:10.1098/rsob.130206  
808 (2014).
- 809 53 Guder, C. *et al.* The Wnt code: cnidarians signal the way. *Oncogene* **25**, 7450-  
810 7460, doi:10.1038/sj.onc.1210052 (2006).
- 811 54 Lee, P. N., Pang, K., Matus, D. Q. & Martindale, M. Q. A WNT of things to come:  
812 evolution of Wnt signaling and polarity in cnidarians. *Semin Cell Dev Biol* **17**,  
813 157-167, doi:10.1016/j.semcd.2006.05.002 (2006).

- 814 55 Kraus, Y., Aman, A., Technau, U. & Genikhovich, G. Pre-bilaterian origin of the  
815 blastoporal axial organizer. *Nat Commun* **7**, 11694, doi:10.1038/ncomms11694  
816 (2016).
- 817 56 Plickert, G., Jacoby, V., Frank, U., Muller, W. A. & Mokady, O. Wnt signaling in  
818 hydroid development: formation of the primary body axis in embryogenesis and  
819 its subsequent patterning. *Dev Biol* **298**, 368-378,  
820 doi:10.1016/j.ydbio.2006.06.043 (2006).
- 821 57 Bartel, D. P. MicroRNAs: genomics, biogenesis, mechanism, and function. *Cell*  
822 **116**, 281-297, doi:10.1016/s0092-8674(04)00045-5 (2004).
- 823 58 DuBuc, T. Q., Stephenson, T. B., Rock, A. Q. & Martindale, M. Q. Hox and Wnt  
824 pattern the primary body axis of an anthozoan cnidarian before gastrulation. *Nat*  
825 *Commun* **9**, 2007, doi:10.1038/s41467-018-04184-x (2018).
- 826 59 Yasuoka, Y., Shinzato, C. & Satoh, N. The Mesoderm-Forming Gene brachyury  
827 Regulates Ectoderm-Endoderm Demarcation in the Coral *Acropora digitifera*.  
828 *Curr Biol* **26**, 2885-2892, doi:10.1016/j.cub.2016.08.011 (2016).
- 829 60 Duffy, D. J., Plickert, G., Kuenzel, T., Tilmann, W. & Frank, U. Wnt signaling  
830 promotes oral but suppresses aboral structures in *Hydractinia* metamorphosis  
831 and regeneration. *Development* **137**, 3057-3066, doi:10.1242/dev.046631  
832 (2010).
- 833 61 Krasovec, G., Pottin, K., Rosello, M., Queinnec, E. & Chambon, J. P. Apoptosis  
834 and cell proliferation during metamorphosis of the planula larva of *Clytia*  
835 *hemisphaerica* (Hydrozoa, Cnidaria). *Dev Dyn* **250**, 1739-1758,  
836 doi:10.1002/dvdy.376 (2021).
- 837 62 Momose, T., Kraus, Y. & Houlston, E. A conserved function for Strabismus in  
838 establishing planar cell polarity in the ciliated ectoderm during cnidarian larval  
839 development. *Development* **139**, 4374-4382, doi:10.1242/dev.084251 (2012).
- 840 63 Kumburegama, S., Wijesena, N., Xu, R. & Wikramanayake, A. H. Strabismus-  
841 mediated primary archenteron invagination is uncoupled from Wnt/beta-catenin-  
842 dependent endoderm cell fate specification in *Nematostella vectensis* (Anthozoa,  
843 Cnidaria): Implications for the evolution of gastrulation. *Evodevo* **2**, 2,  
844 doi:10.1186/2041-9139-2-2 (2011).



- 845 64 Nath, R. D. *et al.* The Jellyfish *Cassiopea* Exhibits a Sleep-like State. *Curr Biol*  
846 **27**, 2984-2990 e2983, doi:10.1016/j.cub.2017.08.014 (2017).
- 847 65 Kanaya, H. J. *et al.* A sleep-like state in *Hydra* unravels conserved sleep  
848 mechanisms during the evolutionary development of the central nervous system.  
849 *Sci Adv* **6**, doi:10.1126/sciadv.abb9415 (2020).
- 850 66 Fuchs, B. *et al.* Regulation of polyp-to-jellyfish transition in *Aurelia aurita*. *Curr*  
851 *Biol* **24**, 263-273, doi:10.1016/j.cub.2013.12.003 (2014).
- 852 67 Lommel, M. *et al.* *Hydra* Mesoglea Proteome Identifies Thrombospondin as a  
853 Conserved Component Active in Head Organizer Restriction. *Sci Rep* **8**, 11753,  
854 doi:10.1038/s41598-018-30035-2 (2018).

855

856

## 857 **Acknowledgement**

858 We thank R. Deguchi (Miyagi Univ. Education, Japan) for sharing *Cladonema pacificum*  
859 and EMBRC France for sharing *Clytia hemisphaerica*. We thank T. Momose (Sorbonne  
860 University, CNRS, France) for helpful discussion. We thank I. Nagai, H. Nakatani, and  
861 A. Sasaki for technical assistance; and A. Dahal, A. Tanimoto, and J. Higuchi for  
862 *Nematostella* culture. This work was supported by JST grant number JPMJCR1852 to  
863 E.K., AMED under grant number JP21gm6110025 to Y.N., and the JSPS KAKENHI  
864 grant numbers JP21H05255 to E.K., and JP17H06332, JP19K22550, JP22H02762 to  
865 Y.N.

866

867

## 868 **Author contributions**

869 T.M.-O. conceptualized and designed the project, performed experiments using jellyfish,  
870 analyzed data, prepared figures, and wrote the manuscript. S.F. performed experiments  
871 and analyzed data. R.N. performed experiments using *Nematostella*. H.W.  
872 conceptualized and designed the project. E.K. contributed reagents. Y.N.  
873 conceptualized and designed the project, prepared figures, and wrote the manuscript.  
874 All authors approved the final manuscript.

875

876



## 877 **Data availability**

878 The datasets used and/or analysed during the current study are available from the  
879 corresponding author on reasonable request and nucleotide sequences are available in  
880 the GenBank/EMBL/DDBJ under the accession numbers (*CpWnt1*, LC720432;  
881 *CpWnt1b*, LC720433; *CpWnt2*, LC720434; *CpWnt3*, LC720435; *CpWnt5*, LC720436;  
882 *CpWnt6*, LC720437; *CpWnt8*, LC720438; *CpWntA*, LC720439; *CpBrachyury*,  
883 LC720440; *CpFoxQ2a*, LC720441; *F-actin capping protein subunit beta*, LC720442;  
884 *CpEF1alpha*, LC720443).

885

886

## 887 **Competing interests**

888 The authors declare no competing interests.

889

890

## 891 **Figure legends**

892

### 893 **Figure 1. The hydrozoan jellyfish *Clytia hemisphaerica* and *Cladonema pacificum*.**

894 (A) Cladogram depicting the phylogenetic position of cnidarian jellyfish. As the sister  
895 group of Bilateria, the phylum Cnidaria is divided into two clades, Anthozoa and  
896 Medusozoa, which consists of four classes: Hydrozoa, Staurozoa, Scyphozoa, and  
897 Cubozoa. **Hydrozoa** includes polyp type animals without a medusa stage (e.g. *Hydra*  
898 and *Hydractinia*) and jellyfish that have both polyp and medusa stages (e.g. *Clytia* and  
899 *Cladonema*). (B and C) Photos of an adult medusa and the eggs of *Clytia*  
900 *hemisphaerica* (B) and *Cladonema pacificum* (C). Scale bars: 1 mm for medusae; 100  
901  $\mu\text{m}$  for eggs.

902

903

### 904 **Figure 2. The electroporation procedure for jellyfish eggs. (A) Schematic of**

905 spawning under the 24 h light/dark cycle. *Clytia hemisphaerica* are maintained on a 13  
906 h dark/11 h light cycle. After light stimuli, sperm spawning occurs within 60-90 min and  
907 egg spawning occurs within 90-120 min. *Cladonema pacificum* are maintained on a  
908 23.5 h light/0.5 h dark cycle. After dark stimuli, sperm and egg spawning occurs within

909 25 min. **(B)** Fertilized eggs are resuspended in 15% Ficoll/artificial sea water to prevent  
910 precipitation of eggs during electroporation. **(C)** Electroporation is performed with the  
911 Bio-Rad Gene Pulser Xcell electroporation system and a cuvette with a 4 mm gap. **(D)**  
912 Visualization of the Rhodamine-Dextran delivery into eggs by electroporation.  
913 Rhodamine is shown in red. While little or no fluorescence was observed in eggs  
914 without electroporation (No EP), under the condition of a single 50 V pulse for 25 ms,  
915 rhodamine signals were detected in both *Clytia* and *Cladonema* eggs without cell  
916 damage. For clarity, egg outlines are indicated with dashed lines for eggs without  
917 electroporation. Scale bars: 200  $\mu$ m.

918  
919

920 **Figure 3. Phenotypes of *GFP1* knockdown with siRNA in *Clytia* fertilized eggs. (A)**  
921 Schematic of the siRNA electroporation procedure using fertilized eggs. Fertilized eggs  
922 in 15% Ficoll/artificial sea water mixed with siRNA are incubated for 5 min, and  
923 electroporation is conducted after transferring into a cuvette. **(B and C)** Phenotypes of  
924 *Clytia* 2-day planula after *CheGFP1* siRNA knockdown. **(D)** Boxplots showing the GFP  
925 fluorescence intensity mean values in 2-day planula after electroporation of 0 and 600  
926 ng/ $\mu$ l siRNAs targeting *CheGFP1*. Center lines indicate the medians; x's denote the  
927 means; box limits represent the 25th and 75th percentiles; whiskers show the maximum  
928 and minimum values. 0 ng/ $\mu$ l, n=24; 600 ng/ $\mu$ l, n=81. \*\*\*p<0.001. **(E-H)** Phenotypes of  
929 3-day planula after siRNA targeting *CheGFP1* electroporation (0, 150, 300, and 600  
930 ng/ $\mu$ l si*CheGFP1*). **(I and J)** For quantification of green fluorescence, we classified  
931 phenotypes into two categories: planula with ring-like green fluorescence as “wild-type,”  
932 and planula with reduced green fluorescence as “reduced”. **(K)** Quantification of planula  
933 larvae positive for *CheGFP1* (wild-type). Bar plots show the percentage of wild-type  
934 phenotype after *CheGFP1* knockdown. Number of examined planula: 0 ng/ $\mu$ l, n=82; 150  
935 ng/ $\mu$ l, n=64; 300 ng/ $\mu$ l, n=58; 600 ng/ $\mu$ l, n=114. Error bars: maximum and minimum  
936 values. Experiments were repeated three times. p-values: 150 ng/ $\mu$ l, p=0.064505; 300  
937 ng/ $\mu$ l, p=0.001437; 600 ng/ $\mu$ l, p=0.00066. \*\*p<0.01, \*\*\*p<0.001. **(L)** Quantification of  
938 *CheGFP1* mRNA expression levels in 3-day planula by RT-qPCR. *CheEF1alpha* was  
939 used as an internal control. Bar heights represent mean values of at least three  
940 independent experiments. *CheGFP1* expression levels are standardized relative to the

941 control (0 ng/ $\mu$ l) condition. Error bars: standard deviation. Experiments were performed  
942 in triplicated and repeated at least three times. p-values: 150 ng/ $\mu$ l,  $p=0.829361$ ; 300  
943 ng/ $\mu$ l,  $p=0.08588$ ; 600 ng/ $\mu$ l,  $p=0.037359$ .  $*p<0.05$ . Scale bars: 200  $\mu$ m.

944

945

946 **Figure 4. Phenotypes of *Wnt3* knockdown with siRNA in *Clytia* fertilized eggs. (A**  
947 **and B)** Typical phenotypes of *Clytia* 1-day planula. While morphologies of control  
948 planula (0 ng/ $\mu$ l) have an elongated oval-shape (A), those of *CheWnt3* siRNA (400  
949 ng/ $\mu$ l) are spherical in shape (B). (C) Schematic of ellipse approximation for planula  
950 morphology and calculation of the aspect ratio. The aspect ratio was calculated by  
951 dividing the long axis (a) by short axis (b). (D) Boxplots showing the aspect ratio of the  
952 1-day planula. Center lines show the medians; x's denote the mean values; box limits  
953 indicate the 25th and 75th percentiles; whiskers show maximum and minimum values;  
954 inner points and outliers are represented by circles. Number of examined planula: 0  
955 ng/ $\mu$ l,  $n=127$ ; 400 ng/ $\mu$ l,  $n=25$ ,  $***p<0.001$ . (E-H) Phenotypes of 1-day planula after  
956 siRNA targeting *CheWnt3* electroporation (0, 100, 200, and 400 ng/ $\mu$ l si*CheWnt3*). (I  
957 and J) For morphology quantification, we classified planula phenotypes into two  
958 categories: elongated oval shape as "normal" and spherical (circle) shape as  
959 "spherical". (K) Bar plots show the percentage of normal phenotypes across four  
960 different siRNA doses as well as planulae treated with shRNA and siNC, a siRNA  
961 universal negative control. Percentages are the mean value and error bars indicate  
962 standard deviation. Numbers of examined planula: 0 ng/ $\mu$ l,  $n=127$ ; 100 ng/ $\mu$ l,  $n=75$ ; 200  
963 ng/ $\mu$ l,  $n=86$ ; 400 ng/ $\mu$ l,  $n=95$ . shRNA 400 ng/ $\mu$ l,  $n=288$ ; siNC 400 ng/ $\mu$ l,  $n=45$ .  
964 Experiments were repeated three times. Error bars: maximum and minimum values. p-  
965 values: 100 ng/ $\mu$ l,  $p=0.000599$ ; 200 ng/ $\mu$ l,  $p=0.000438$ ; 400 ng/ $\mu$ l,  $p=0.000402$ ; 400  
966 ng/ $\mu$ l of shRNA,  $p=0.031928$ ; 400 ng/ $\mu$ l of siNC,  $p=0.283359$ .  $*p<0.05$ ,  $***p<0.001$ . (L)  
967 Quantification of *CheWnt3* mRNA levels of 1-day planula by RT-qPCR. *CheEF1alpha*  
968 was used as an internal control. Bar heights represent the mean value. *CheWnt3*  
969 expression levels are standardized relative to the control (0 ng/ $\mu$ l). Error bars: standard  
970 deviation. p-values: 100 ng/ $\mu$ l,  $p=0.00799$ ; 200 ng/ $\mu$ l,  $p=0.000754$ ; 400 ng/ $\mu$ l,  $p=$   
971  $0.000733$ ; 400 ng/ $\mu$ l of shRNA,  $p=0.095403$ ; 400 ng/ $\mu$ l of siNC,  $p=0.900264$ .  $**p<0.01$ ,

972 \*\*\* $p < 0.001$ . n.s., not significant. Experiments were performed in triplicate and repeated  
973 at least three times. Scale bars: (A, B, E-H) 400  $\mu\text{m}$ , (I, J) 100  $\mu\text{m}$ .

974

975

976 **Figure 5. Phenotypes of *Wnt3* knockdown with siRNA in *Cladonema* fertilized**  
977 **eggs. (A)** Typical morphology of *Cladonema* egg and planula. The wild-type  
978 *Cladonema* planula larvae exhibit a slight oval shape. To deliver siRNAs targeting  
979 *CpWnt3*, electroporation was performed in fertilized eggs (1-cell stage), and phenotypes  
980 were confirmed at planula in one day. **(B and C)** Phenotypes of 1-day planula after  
981 *CpWnt3* siRNA knockdown. **(D)** Schematic of ellipse approximation for planula  
982 morphology and calculation of the aspect ratio. The aspect ratio was calculated by  
983 dividing the long axis (a) by short axis (b). **(E)** Boxplots showing the aspect ratio of the  
984 1-day planula after si*CpWnt3* electroporation (0 and 300 ng/ $\mu\text{l}$ ). Center lines show the  
985 medians; x's denote the mean values; box limits indicate the 25th and 75th percentiles;  
986 whiskers show maximum and minimum values; inner points and outliers are  
987 represented by circles. Number of examined planulae: 0 ng/ $\mu\text{l}$ ,  $n=22$ ; 300 ng/ $\mu\text{l}$ ,  $n=50$ .  
988  $p = 0.658303$ . n.s., not significant. **(F)** Quantification of *CpWnt3* mRNA levels in 1-day  
989 planula by RT-qPCR. *CpEF1alpha* was used as an internal control. Bar heights  
990 represent the mean value. Error bars indicate standard deviation. *CpWnt3* expression  
991 levels are standardized relative to the control (0 ng/ $\mu\text{l}$ ). Experiments were performed in  
992 triplicate and repeated three times. p-values: 150 ng/ $\mu\text{l}$ ,  $p = 0.376498$ ; 300 ng/ $\mu\text{l}$ ,  $p =$   
993  $0.073956$ . **(G, H)** Representative *in situ* hybridization (ISH) image of oral *CpBra*  
994 expression in 1-day planula for control (G: 0 ng/ $\mu\text{l}$  si*CpWnt3*) and *CpWnt3* siRNA (H:  
995 300 ng/ $\mu\text{l}$  si*CpWnt3*). **(I)** Quantification of *CpBra* expression phenotypes based on ISH  
996 images. Stacked bar plots show the percentage of 1-day planulae in each phenotypic  
997 class. *CpBra* expression patterns are categorized into three phenotypes (strong, weak  
998 and none). 0 ng/ $\mu\text{l}$ ,  $n=74$ ; 300 ng/ $\mu\text{l}$ ,  $n=58$ . Scale bars: (B, C) 200  $\mu\text{m}$ , (G, H) 50  $\mu\text{m}$ .

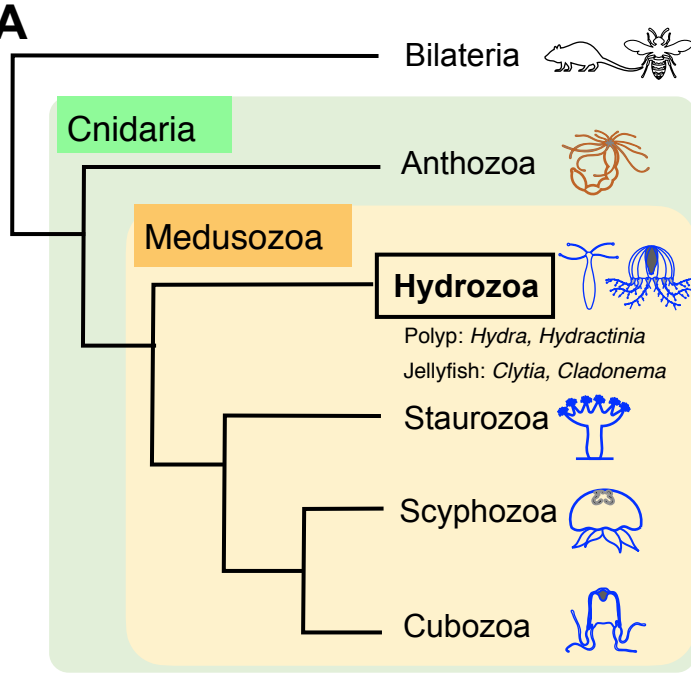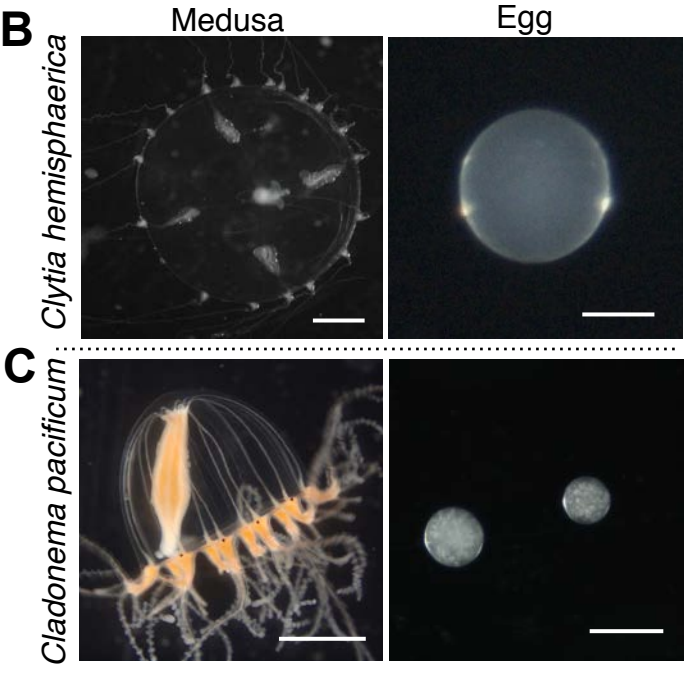

# Figure 2

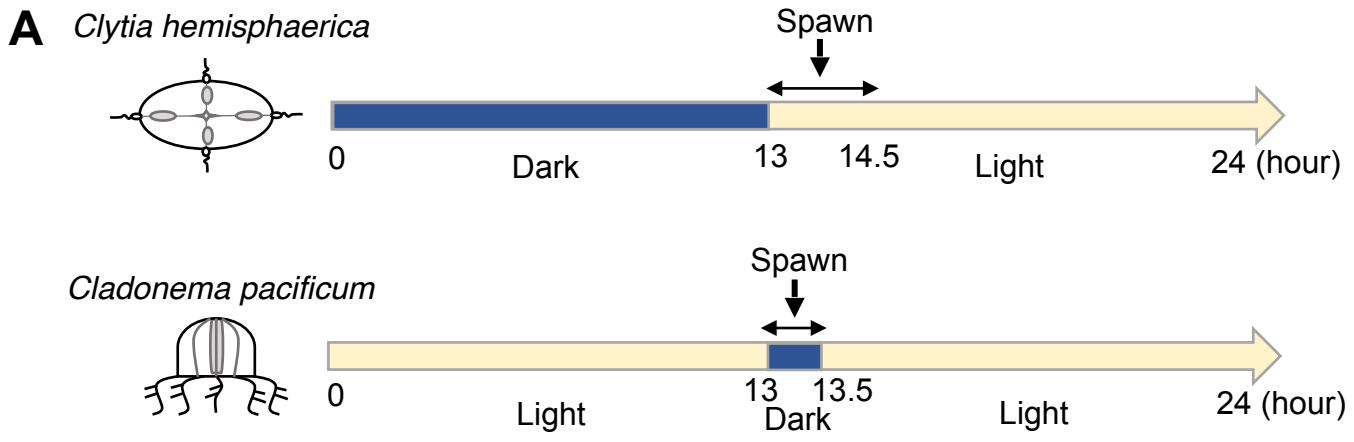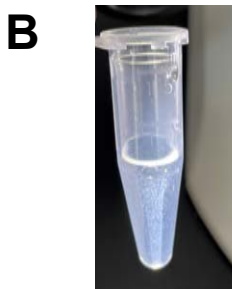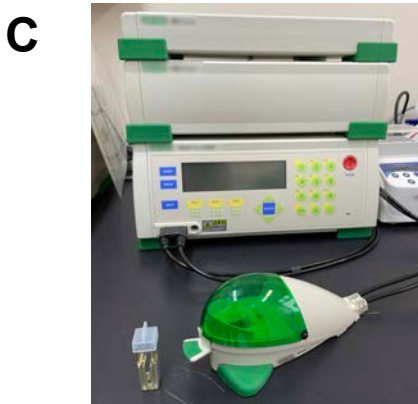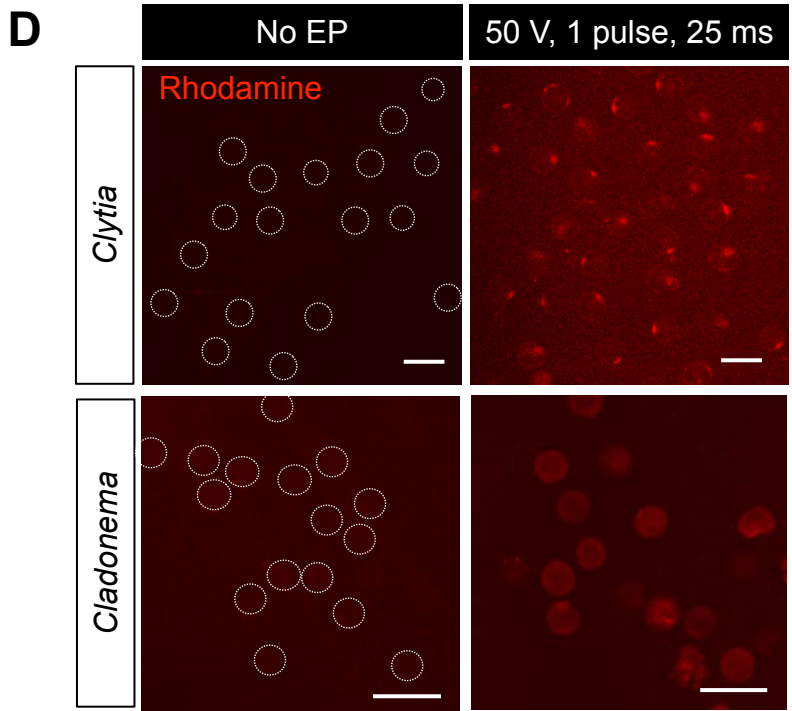



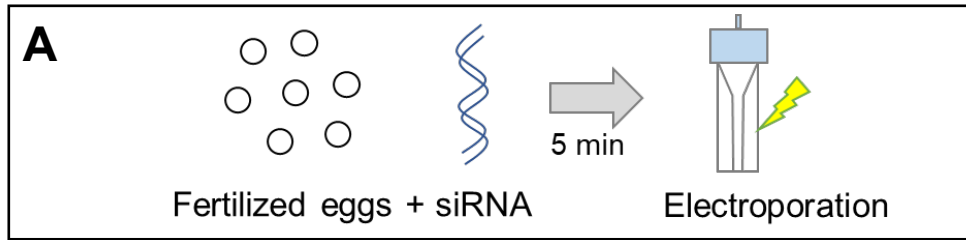

si*CheGFP1* electroporation  
2 day planula

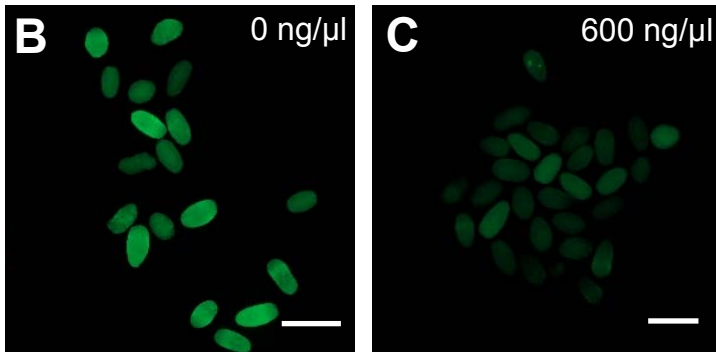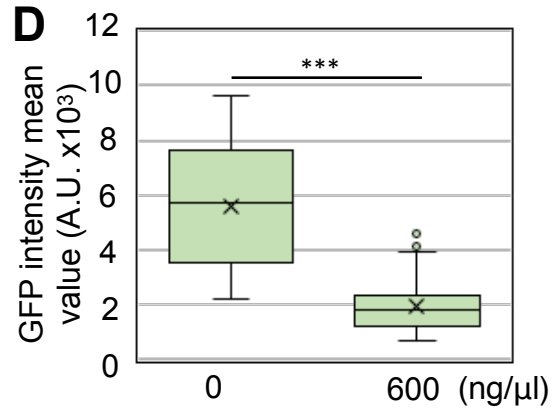

si*CheGFP1* electroporation/3 day planula

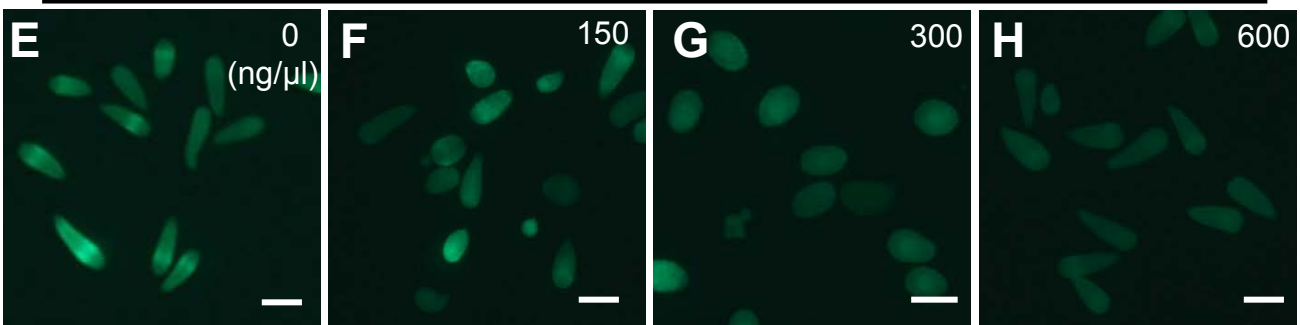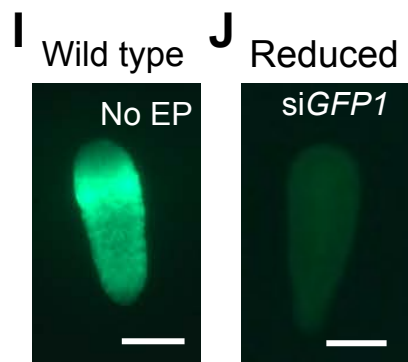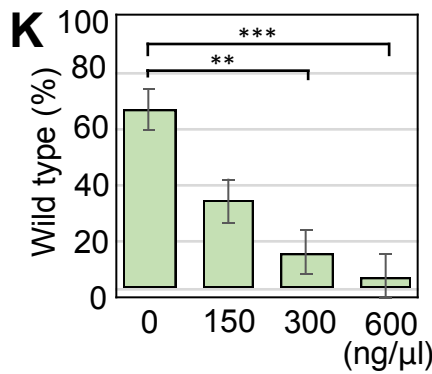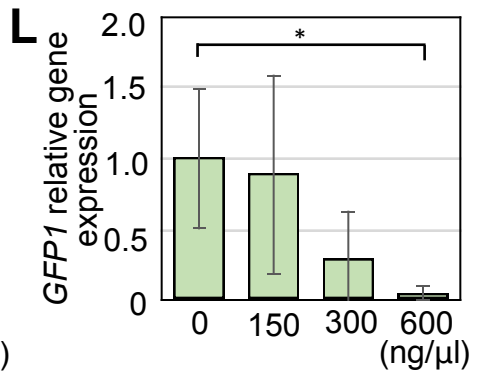

si*CheWnt3* electroporation  
1 day planula

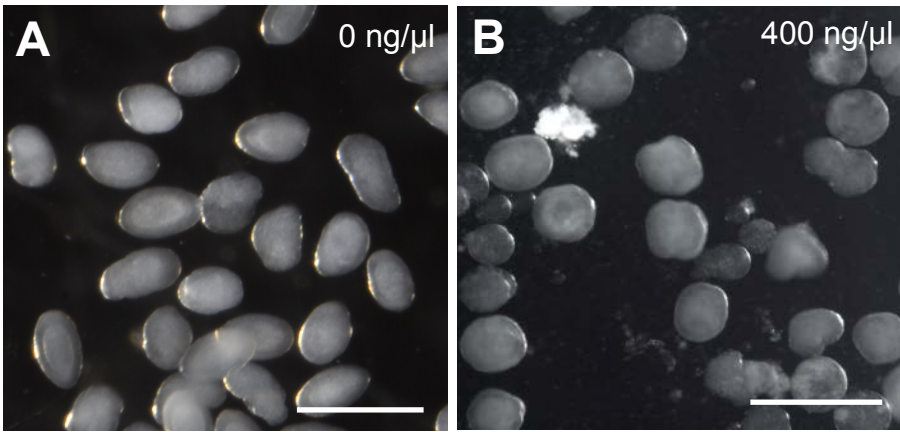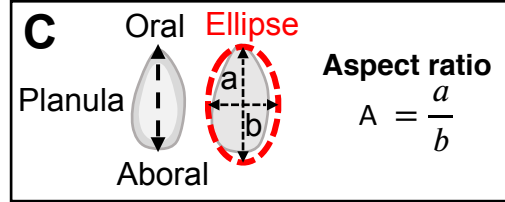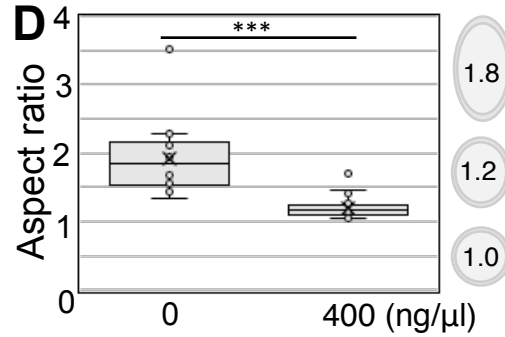

si*CheWnt3* electroporation/1 day planula

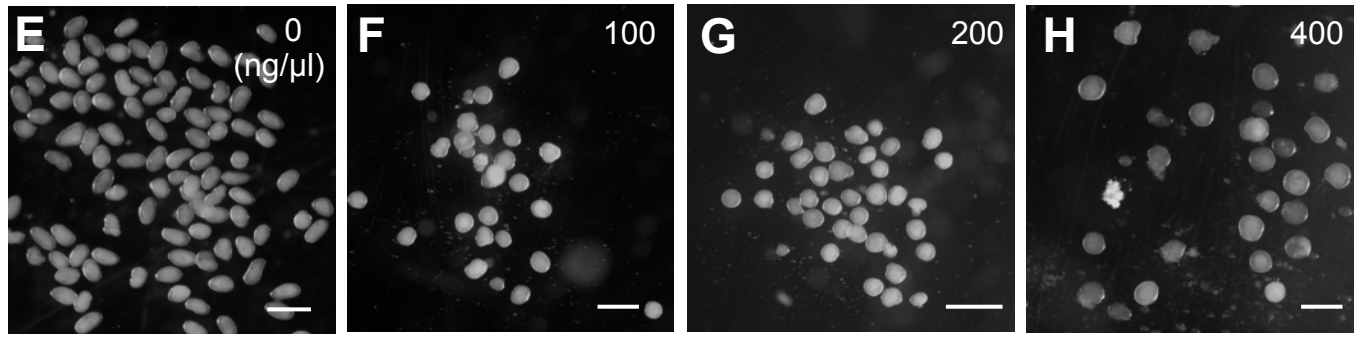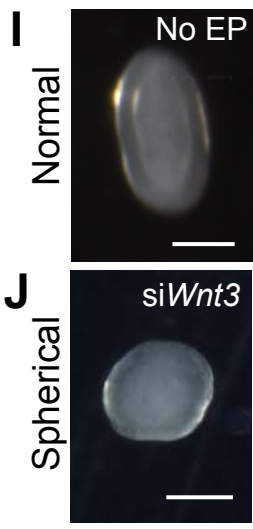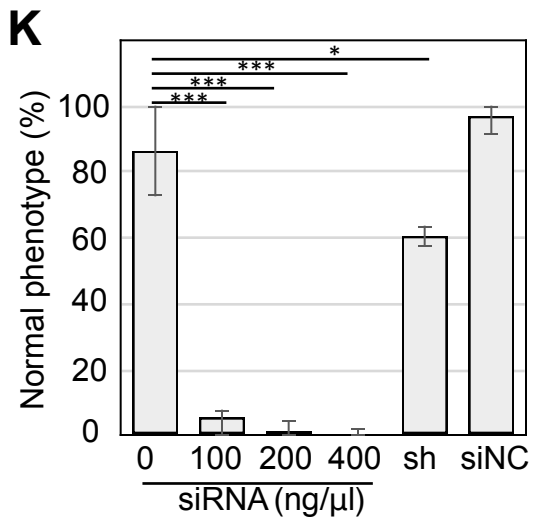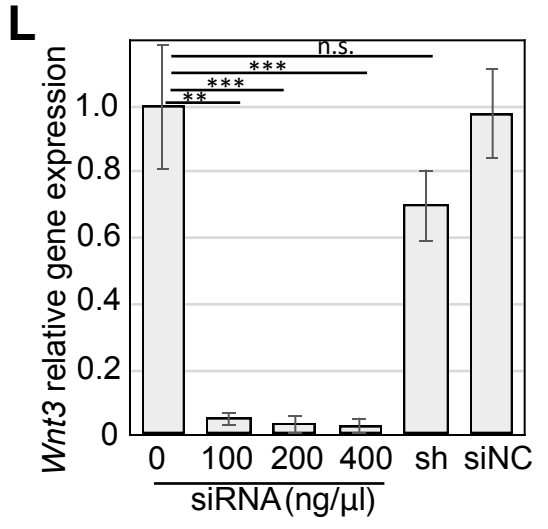

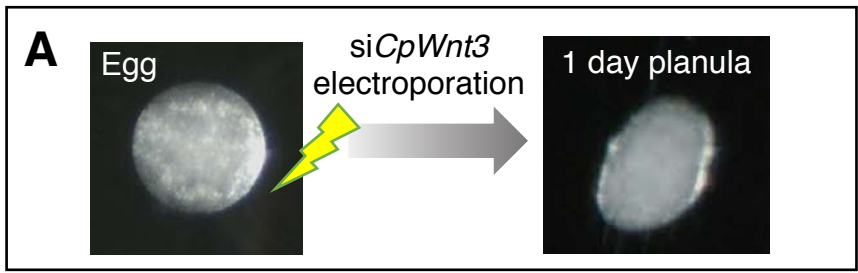

siCpWnt3 electroporation/1 day planula

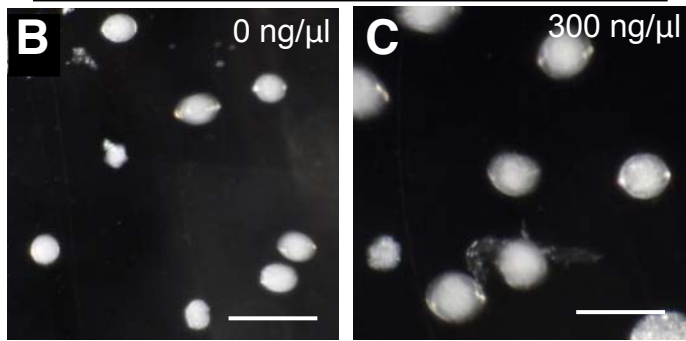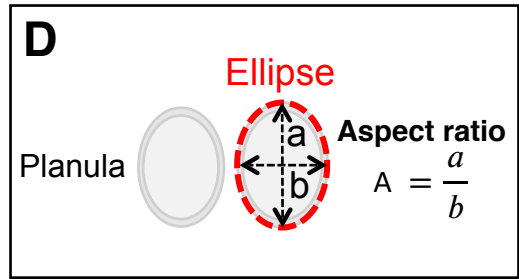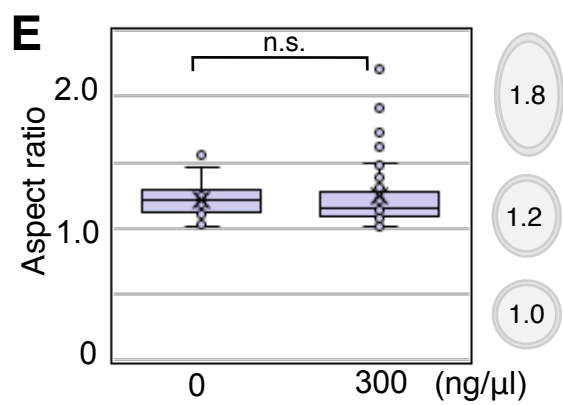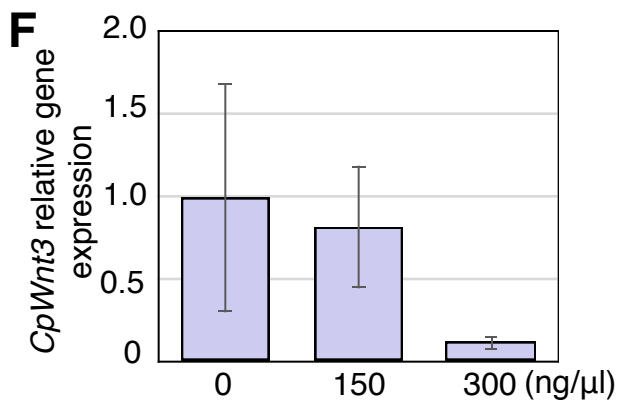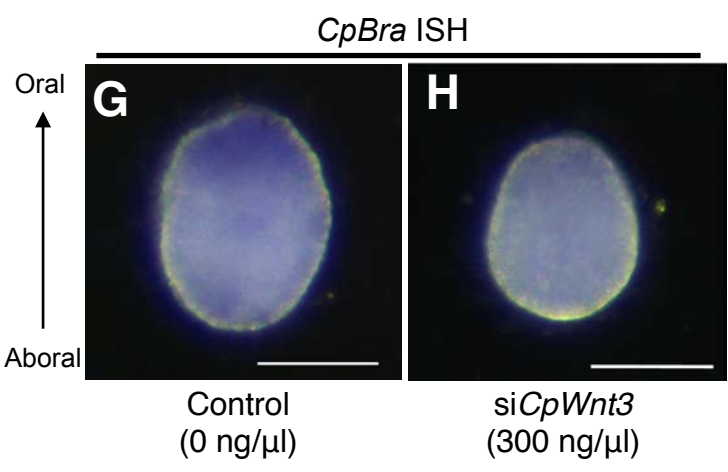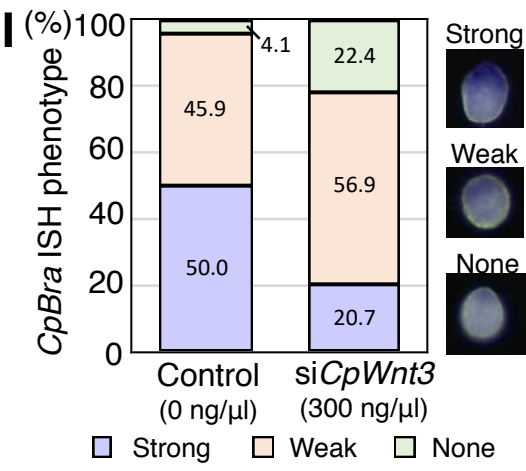

Source: https://www.biorxiv.org/content/10.1101/2022.03.24.485716v2.full.pdf
